# Supplementary material for: New Polyketides from a Hydrothermal Vent Sediment Fungus Trichoderma sp. JWM29-10-1 and Their Antimicrobial Effects
Source: MDPI journal article supplement (doi:10.3390/md20110720), 2022-11-16
Supplement: s1 [file s1]

## Supplementary Information

### New polyketides from a hydrothermal vent sediment fungus *Trichoderma* sp. JWM29-10-1 and their antimicrobial effects

Changrong Lai <sup>a, 1</sup>, Jiayi Chen <sup>a, 1</sup>, Jing Liu <sup>b, 1</sup>, Danmei Tian <sup>a</sup>, Donghe Lan <sup>c</sup>, Tongzheng Liu <sup>a</sup>, Bin Wu <sup>c, \*</sup>, Hongkai Bi <sup>b, \*</sup> and Jinshan Tang <sup>a, \*</sup>

<sup>a</sup> *Institute of Traditional Chinese Medicine and Natural Products, College of Pharmacy/Guangdong Province Key Laboratory of Pharmacodynamic Constituents of Traditional Chinese Medicine and New Drug Research/International Cooperative Laboratory of Traditional Chinese Medicine Modernization and Innovative Drug Development of Ministry of Education (MOE) of China, Jinan University, Guangzhou 510632, China*

<sup>b</sup> *Department of Pathogen Biology, Jiangsu Key Laboratory of Pathogen Biology, Helicobacter pylori Research Centre, Nanjing Medical University, Nanjing 211166, China*

<sup>c</sup> *Ocean College, Zhejiang University, Zhoushan Campus, Zhoushan 316021, China*

<sup>1</sup> These authors contributed equally to this work.

Corresponding authors

Email address: [jstang0615@jnu.edu.cn](mailto:jstang0615@jnu.edu.cn) (J. Tang); [hkbi@njmu.edu.cn](mailto:hkbi@njmu.edu.cn) (H. Bi); [wubin@zju.edu.cn](mailto:wubin@zju.edu.cn) (B.W.)

## Contents

|                                                                                                            |    |
|------------------------------------------------------------------------------------------------------------|----|
| Figure S1 HR-ESI-MS spectrum of compound <b>1</b> .....                                                    | 1  |
| Figure S2 UV spectrum of compound <b>1</b> .....                                                           | 1  |
| Figure S3 IR spectrum of compound <b>1</b> .....                                                           | 2  |
| Figure S4 <sup>1</sup> H-NMR spectrum of compound <b>1</b> (in CDCl <sub>3</sub> ).....                    | 2  |
| Figure S5 <sup>13</sup> C-NMR spectrum of compound <b>1</b> (in CDCl <sub>3</sub> ).....                   | 3  |
| Figure S6 DEPT135 spectrum of compound <b>1</b> (in CDCl <sub>3</sub> ) .....                              | 3  |
| Figure S7 HSQC spectrum of compound <b>1</b> (in CDCl <sub>3</sub> ) .....                                 | 4  |
| Figure S8 HMBC spectrum of compound <b>1</b> (in CDCl <sub>3</sub> ) .....                                 | 4  |
| Figure S9 NOESY spectrum of compound <b>1</b> (in CDCl <sub>3</sub> ) .....                                | 5  |
| Figure S10 HR-ESI-MS spectrum of compound <b>2</b> .....                                                   | 5  |
| Figure S11 UV spectrum of compound <b>2</b> .....                                                          | 6  |
| Figure S12 IR spectrum of compound <b>2</b> .....                                                          | 6  |
| Figure S13 <sup>1</sup> H-NMR spectrum of compound <b>2</b> (in CD <sub>3</sub> OD) .....                  | 7  |
| Figure S14 <sup>13</sup> C-NMR spectrum of compound <b>2</b> (in CD <sub>3</sub> OD) .....                 | 7  |
| Figure S15 DEPT135 spectrum of compound <b>2</b> (in CD <sub>3</sub> OD).....                              | 8  |
| Figure S16 <sup>1</sup> H- <sup>1</sup> H COSY spectrum of compound <b>2</b> (in CD <sub>3</sub> OD).....  | 8  |
| Figure S17 HSQC spectrum of compound <b>2</b> (in CD <sub>3</sub> OD).....                                 | 9  |
| Figure S18 HMBC spectrum of compound <b>2</b> (in CD <sub>3</sub> OD).....                                 | 9  |
| Figure S19 NOESY spectrum of compound <b>2</b> (in CD <sub>3</sub> OD).....                                | 10 |
| Figure S20 HR-ESI-MS spectrum of compound <b>6</b> .....                                                   | 10 |
| Figure S21 UV spectrum of compound <b>6</b> .....                                                          | 11 |
| Figure S22 IR spectrum of compound <b>6</b> .....                                                          | 11 |
| Figure S23 <sup>1</sup> H-NMR spectrum of compound <b>6</b> (in CDCl <sub>3</sub> ).....                   | 12 |
| Figure S24 <sup>13</sup> C-NMR spectrum of compound <b>6</b> (in CDCl <sub>3</sub> ) .....                 | 12 |
| Figure S25 DEPT135 spectrum of compound <b>6</b> (in CDCl <sub>3</sub> ).....                              | 13 |
| Figure S26 <sup>1</sup> H- <sup>1</sup> H COSY spectrum of compound <b>6</b> (in CDCl <sub>3</sub> ) ..... | 13 |
| Figure S27 HSQC spectrum of compound <b>6</b> (in CDCl <sub>3</sub> ) .....                                | 14 |
| Figure S28 HMBC spectrum of compound <b>6</b> (in CDCl <sub>3</sub> ).....                                 | 14 |
| Figure S29 NOESY spectrum of compound <b>6</b> (in CDCl <sub>3</sub> ) .....                               | 15 |

|                                                                                                            |    |
|------------------------------------------------------------------------------------------------------------|----|
| Figure S30 HR-ESI-MS spectrum of compound <b>7</b> .....                                                   | 15 |
| Figure S31 UV spectrum of compound <b>7</b> .....                                                          | 16 |
| Figure S32 IR spectrum of compound <b>7</b> .....                                                          | 16 |
| Figure S33 <sup>1</sup> H-NMR spectrum of compound <b>7</b> (in CDCl <sub>3</sub> ).....                   | 17 |
| Figure S34 <sup>13</sup> C-NMR spectrum of compound <b>7</b> (in CDCl <sub>3</sub> ) .....                 | 17 |
| Figure S35 DEPT135 spectrum of compound <b>7</b> (in CDCl <sub>3</sub> ) .....                             | 18 |
| Figure S36 <sup>1</sup> H- <sup>1</sup> H COSY spectrum of compound <b>7</b> (in CDCl <sub>3</sub> ) ..... | 18 |
| Figure S37 HSQC spectrum of compound <b>7</b> (in CDCl <sub>3</sub> ) .....                                | 19 |
| Figure S38 HMBC spectrum of compound <b>7</b> (in CDCl <sub>3</sub> ).....                                 | 19 |
| Figure S39 NOESY spectrum of compound <b>7</b> (in CDCl <sub>3</sub> ) .....                               | 20 |
| Figure S40 HR-ESI-MS spectrum of compound <b>8</b> .....                                                   | 20 |
| Figure S41 UV spectrum of compound <b>8</b> .....                                                          | 21 |
| Figure S42 IR spectrum of compound <b>8</b> .....                                                          | 21 |
| Figure S43 <sup>1</sup> H-NMR spectrum of compound <b>8</b> (in CDCl <sub>3</sub> ).....                   | 22 |
| Figure S44 <sup>13</sup> C-NMR spectrum of compound <b>8</b> (in CDCl <sub>3</sub> ) .....                 | 22 |
| Figure S45 DEPT135 spectrum of compound <b>8</b> (in CDCl <sub>3</sub> ) .....                             | 23 |
| Figure S46 <sup>1</sup> H- <sup>1</sup> H COSY spectrum of compound <b>8</b> (in CDCl <sub>3</sub> ) ..... | 23 |
| Figure S47 HSQC spectrum of compound <b>8</b> (in CDCl <sub>3</sub> ) .....                                | 24 |
| Figure S48 HMBC spectrum of compound <b>8</b> (in CDCl <sub>3</sub> ).....                                 | 24 |
| Figure S49 NOESY spectrum of compound <b>8</b> (in CDCl <sub>3</sub> ) .....                               | 25 |
| Figure S50 HR-ESI-MS spectrum of compound <b>6A</b> .....                                                  | 25 |
| Figure S51 <sup>1</sup> H-NMR spectrum of compound <b>6A</b> (in CDCl <sub>3</sub> ) .....                 | 26 |
| Figure S52 <sup>13</sup> C-NMR spectrum of compound <b>6A</b> (in CDCl <sub>3</sub> ) .....                | 26 |

### Single Mass Analysis

Tolerance = 5.0 mDa / DBE: min = -1.5, max = 50.0

Element prediction: Off

Number of isotope peaks used for i-FIT = 3

Monoisotopic Mass, Even Electron Ions

46 formula(e) evaluated with 1 results within limits (up to 50 best isotopic matches for each mass)

Elements Used:

C: 0-30 H: 0-50 O: 0-10

JWM29-7-11-2

20220411-24 162 (1.313)

1: TOF MS ES+  
1.11e+005

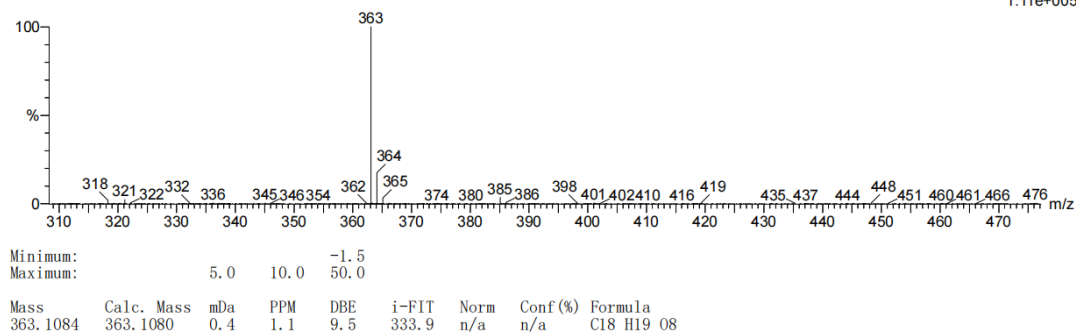

Figure S1 HR-ESI-MS spectrum of compound **1**

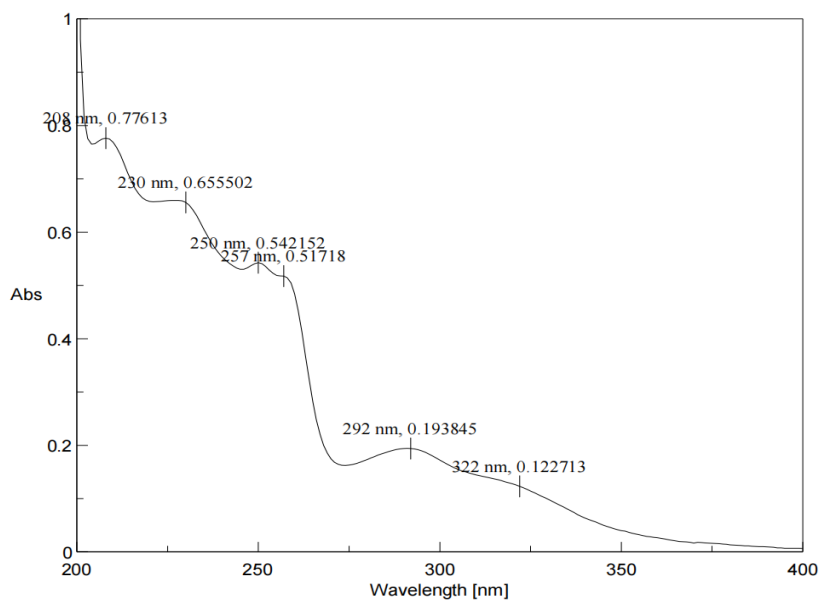

Figure S2 UV spectrum of compound **1**



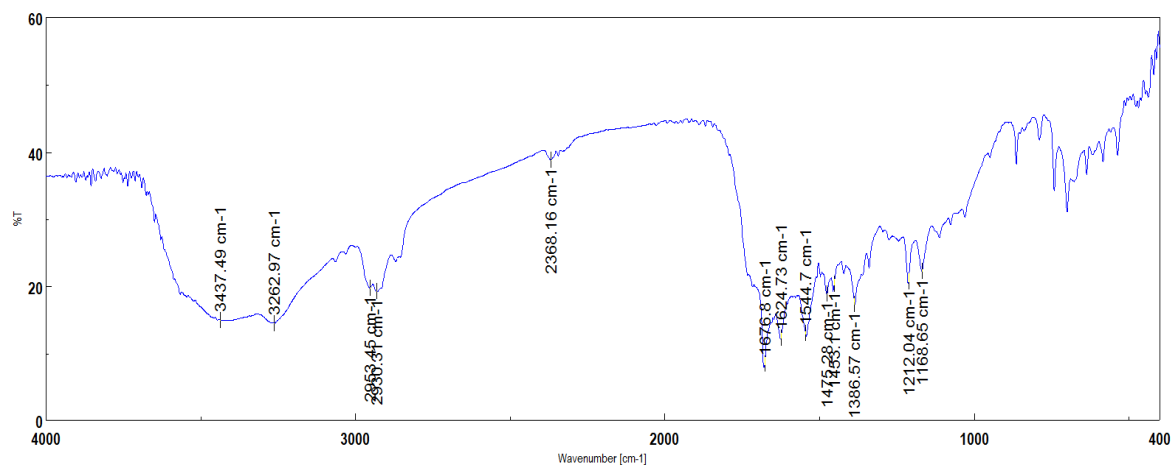

Figure S3 IR spectrum of compound **1**

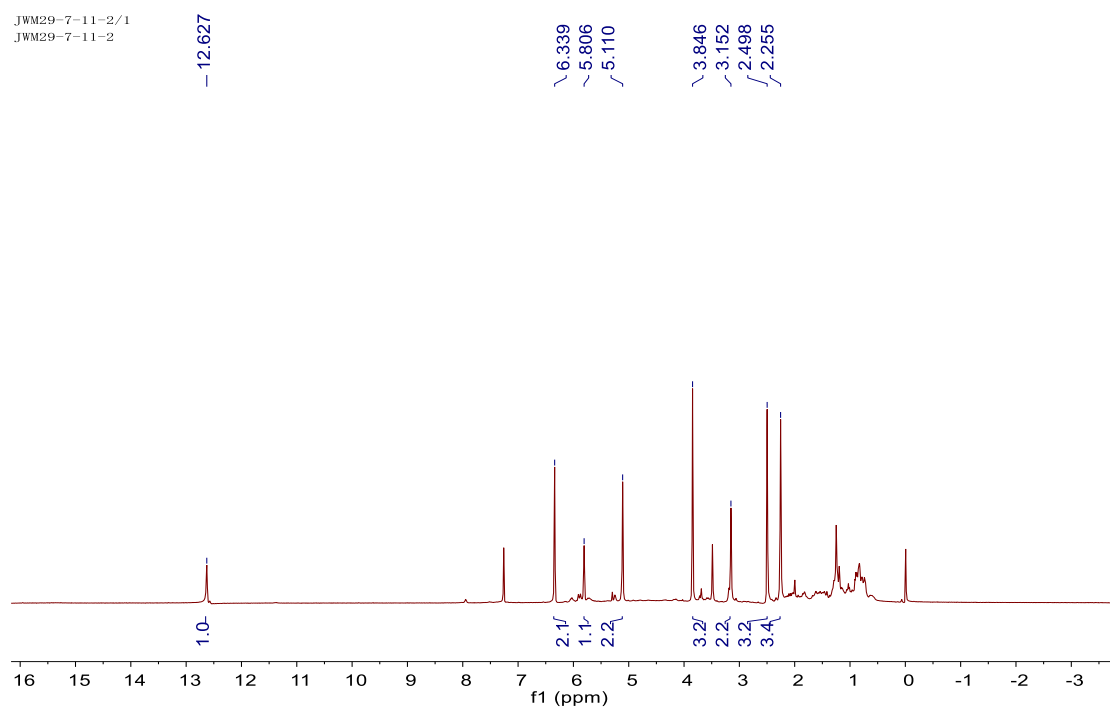

Figure S4 <sup>1</sup>H-NMR spectrum of compound **1** (in CDCl<sub>3</sub>)

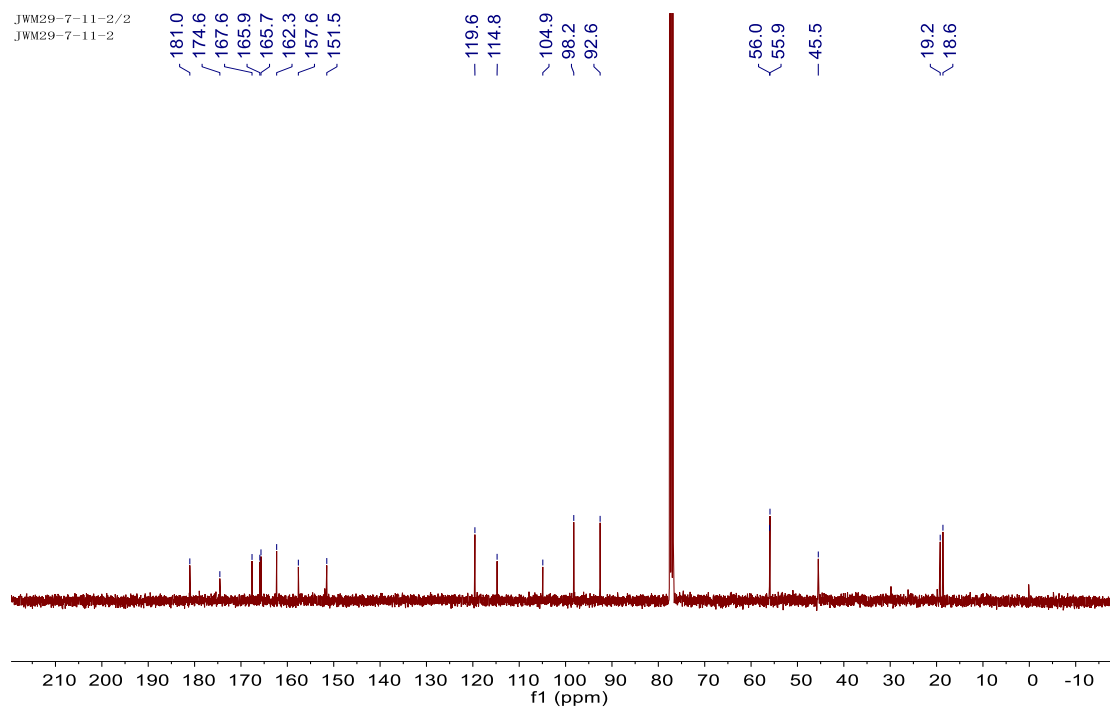

Figure S5  $^{13}\text{C}$ -NMR spectrum of compound **1** (in  $\text{CDCl}_3$ )

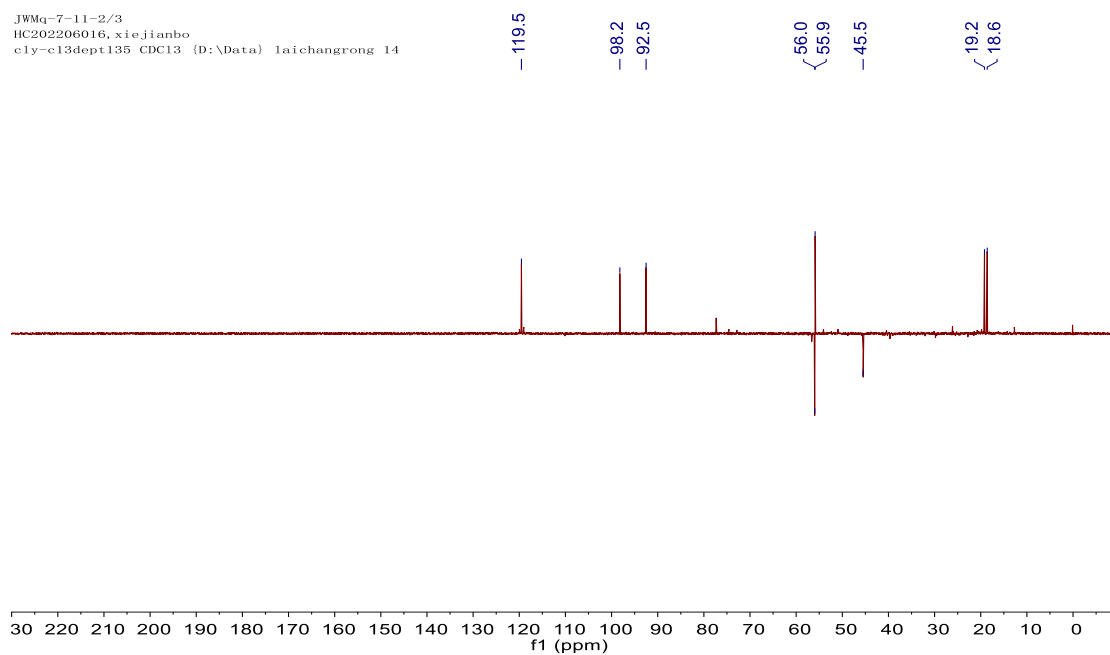

Figure S6 DEPT135 spectrum of compound **1** (in  $\text{CDCl}_3$ )

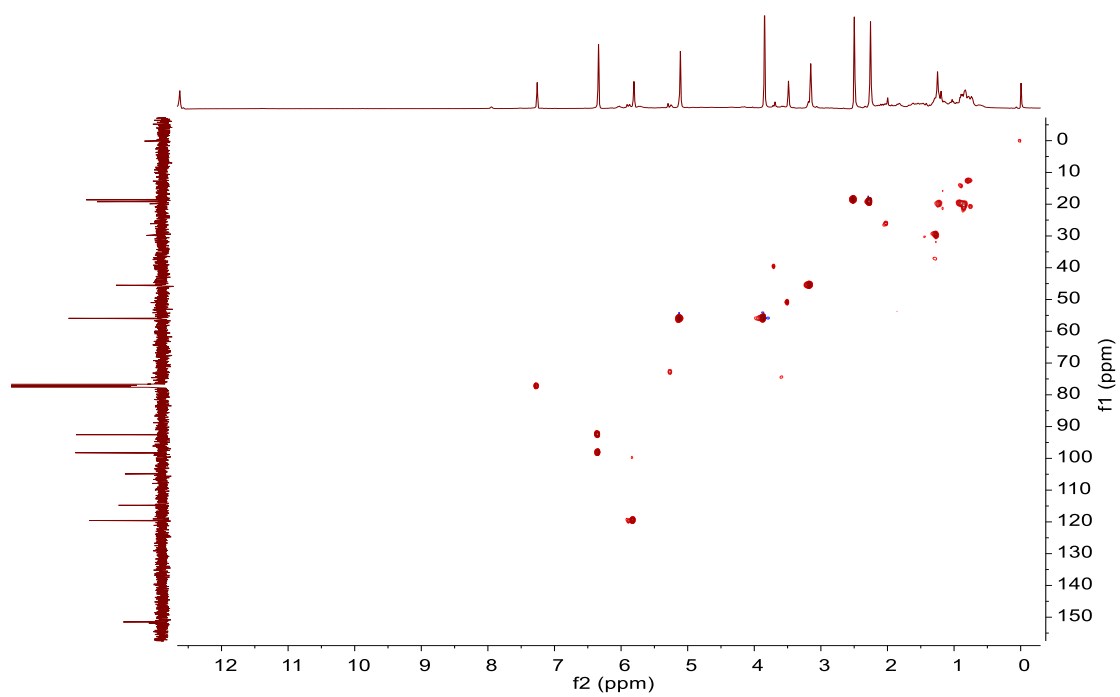

Figure S7 HSQC spectrum of compound **1** (in CDCl<sub>3</sub>)

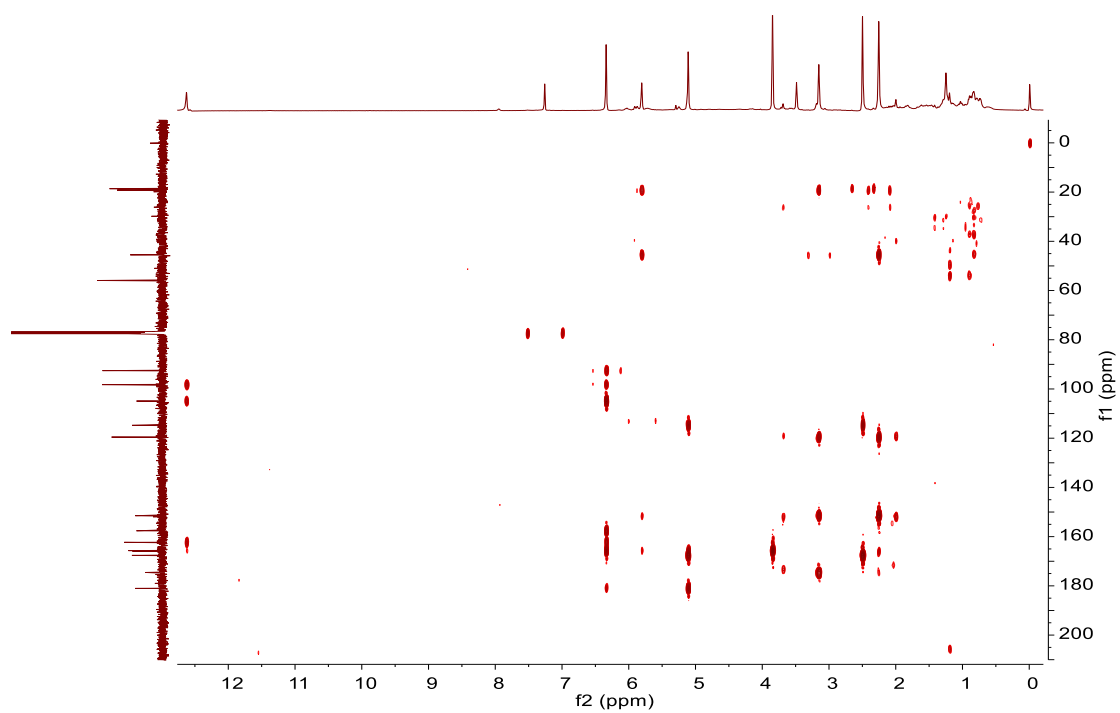

Figure S8 HMBC spectrum of compound **1** (in CDCl<sub>3</sub>)

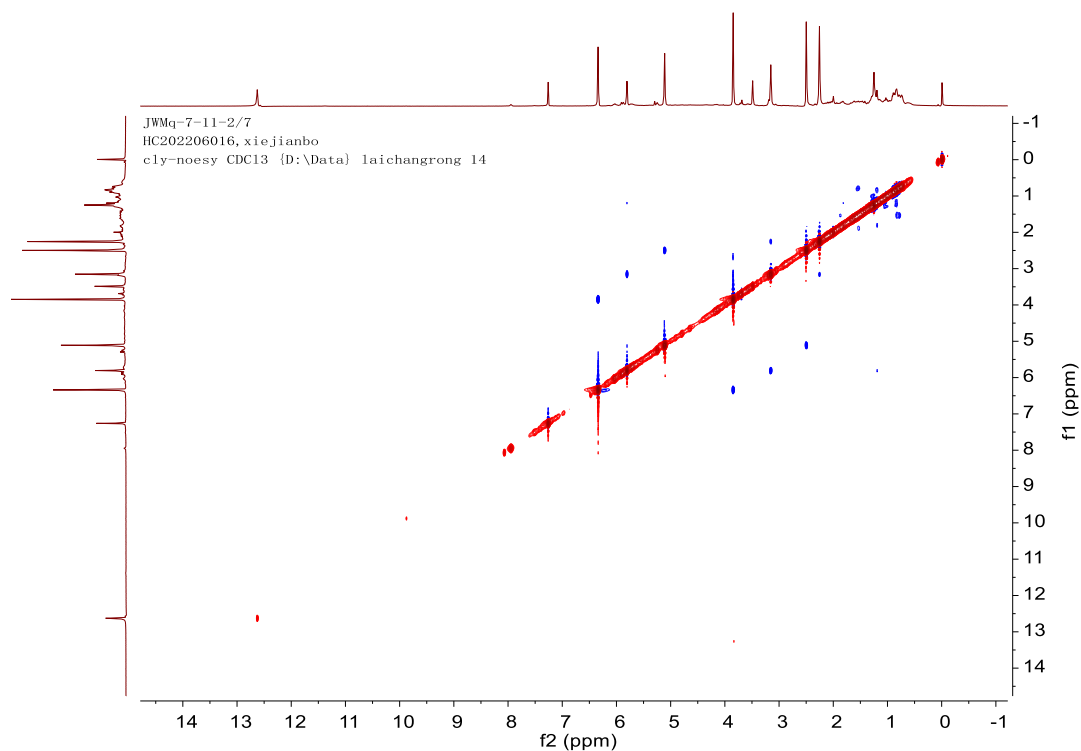

Figure S9 NOESY spectrum of compound **1** (in CDCl<sub>3</sub>)

#### Single Mass Analysis

Tolerance = 5.0 mDa / DBE: min = -1.5, max = 50.0

Element prediction: Off

Number of isotope peaks used for i-FIT = 3

Monoisotopic Mass, Even Electron Ions

33 formula(e) evaluated with 1 results within limits (up to 50 closest results for each mass)

Elements Used:

C: 0-30 H: 0-50 O: 0-10

JWM29-3-5-4

20220322008 129 (1.044)

1: TOF MS ES+  
1.46e+005

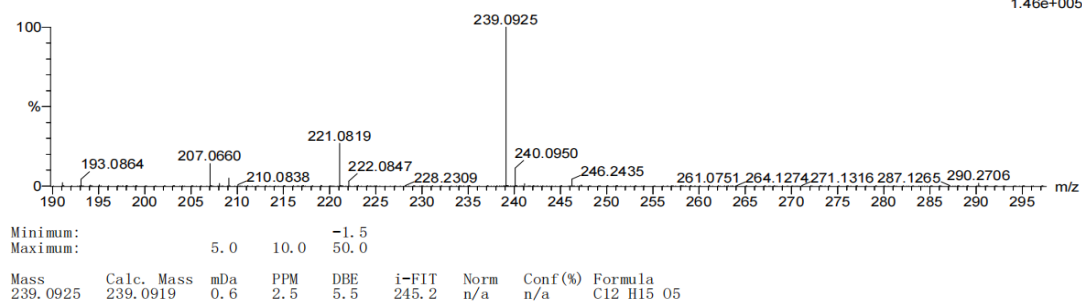

Figure S10 HR-ESI-MS spectrum of compound **2**

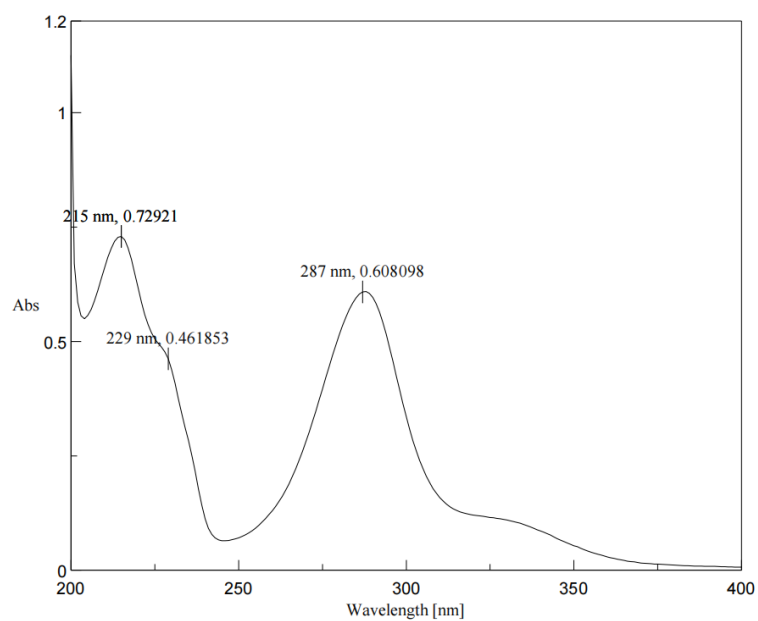

Figure S11 UV spectrum of compound **2**

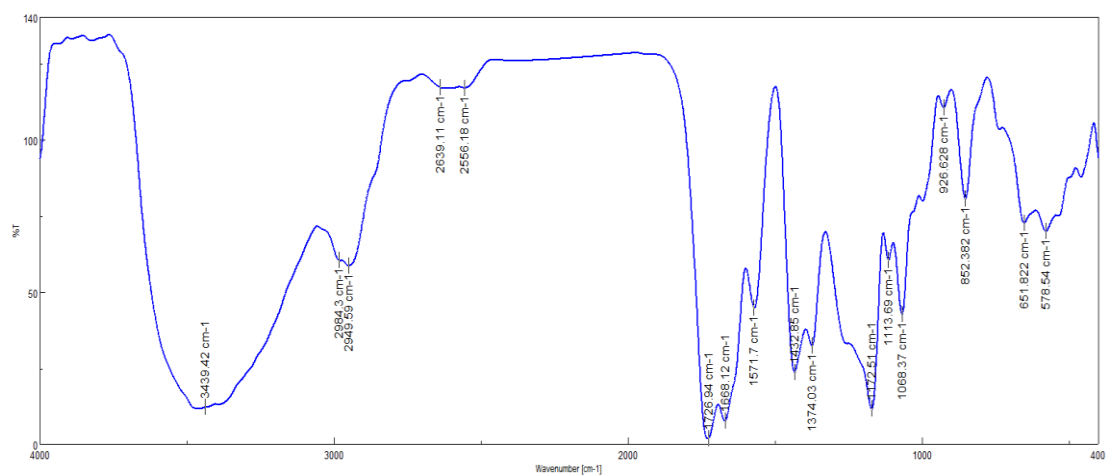

Figure S12 IR spectrum of compound **2**

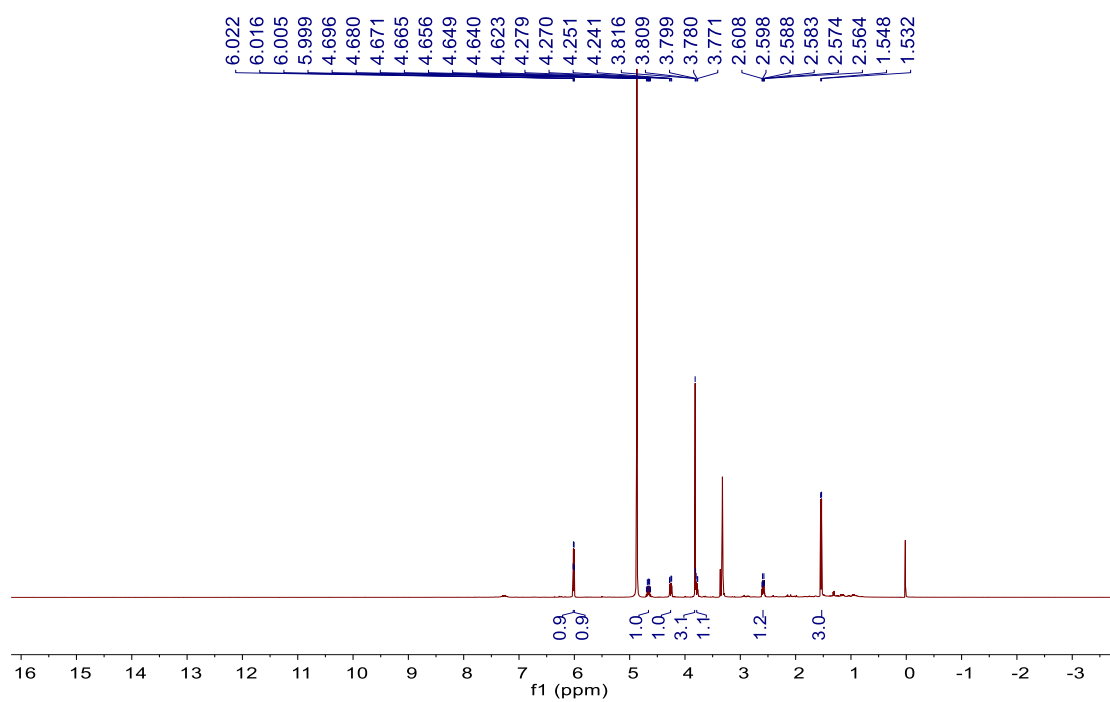

Figure S13 <sup>1</sup>H-NMR spectrum of compound **2** (in CD<sub>3</sub>OD)

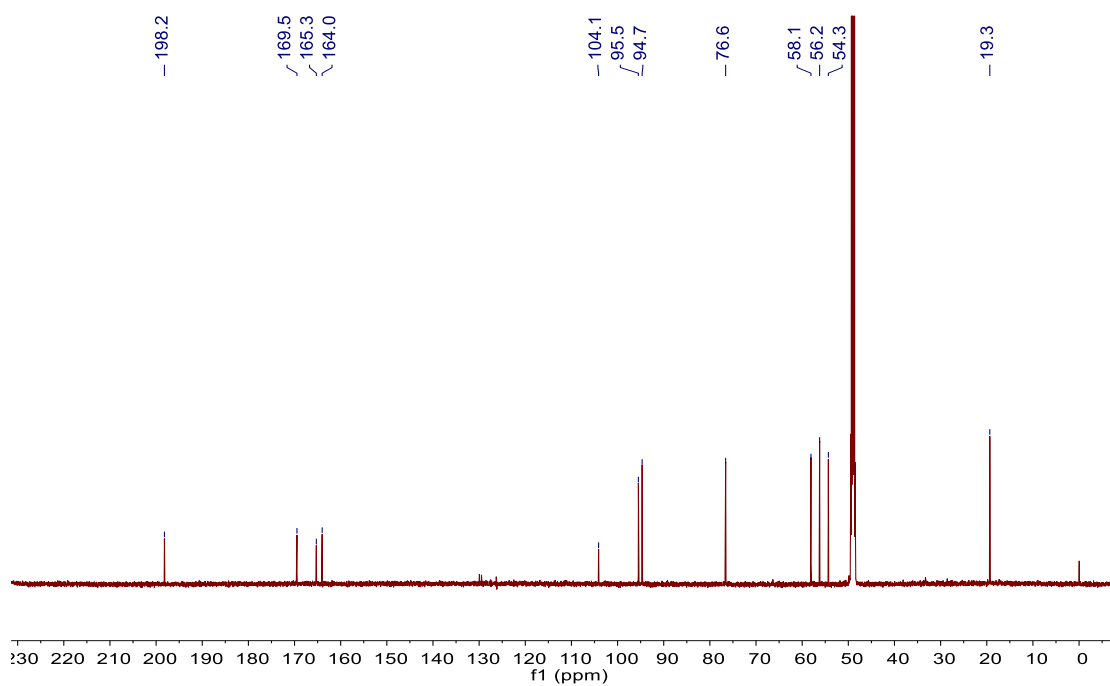

Figure S14 <sup>13</sup>C-NMR spectrum of compound **2** (in CD<sub>3</sub>OD)

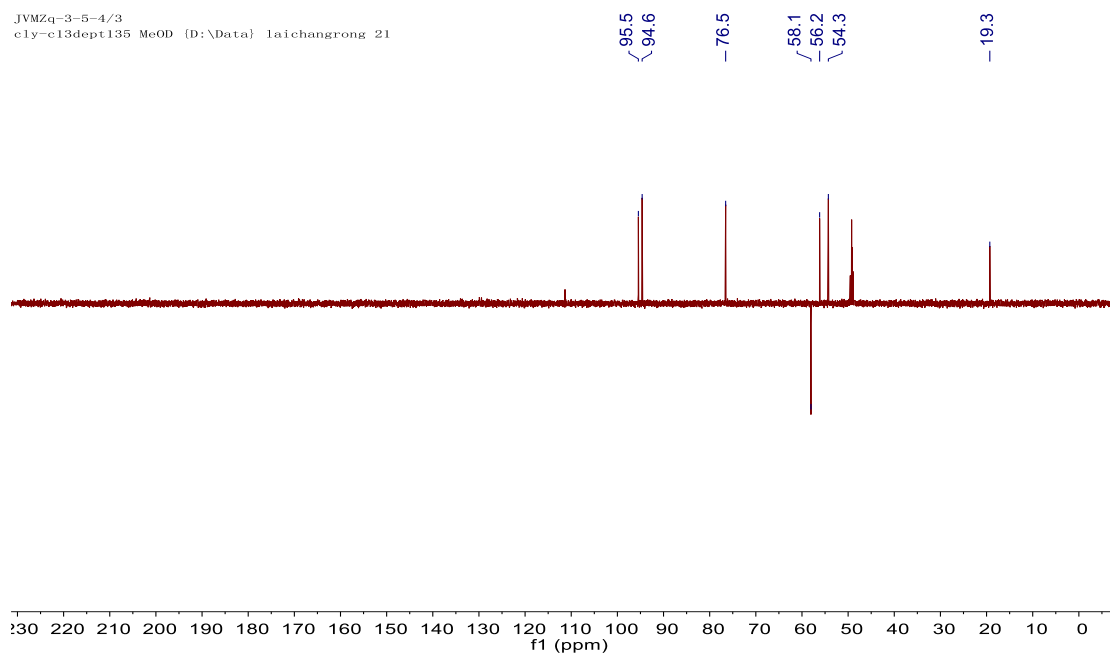

Figure S15 DEPT135 spectrum of compound **2** (in CD<sub>3</sub>OD)

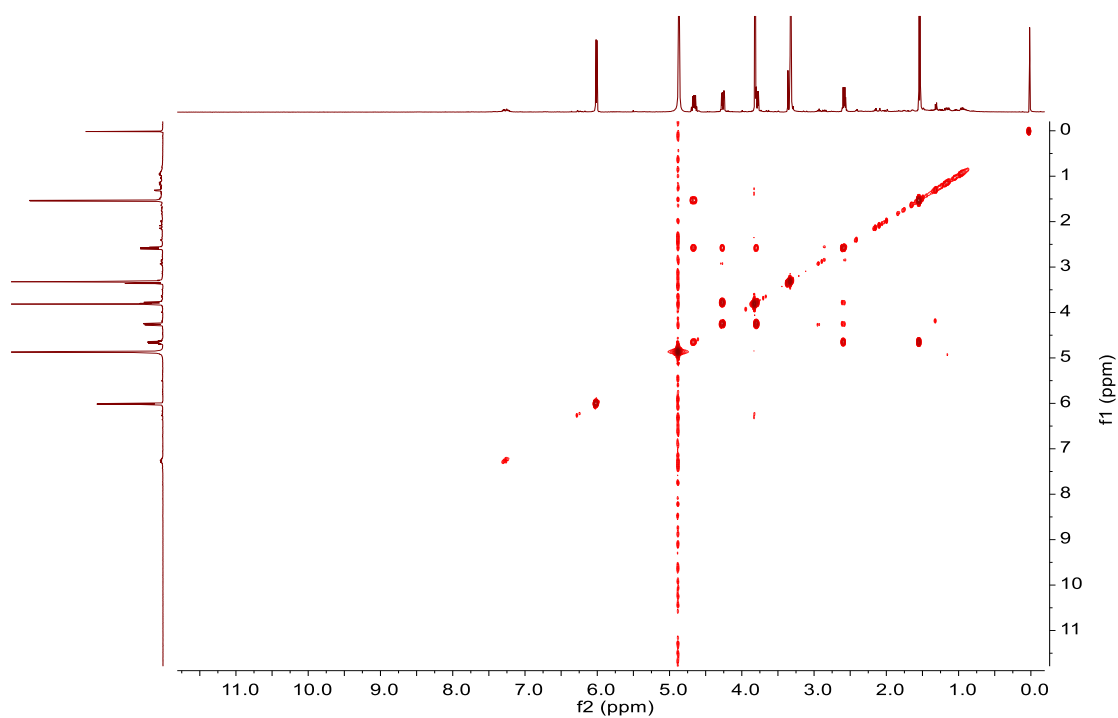

Figure S16 <sup>1</sup>H-<sup>1</sup>H COSY spectrum of compound **2** (in CD<sub>3</sub>OD)

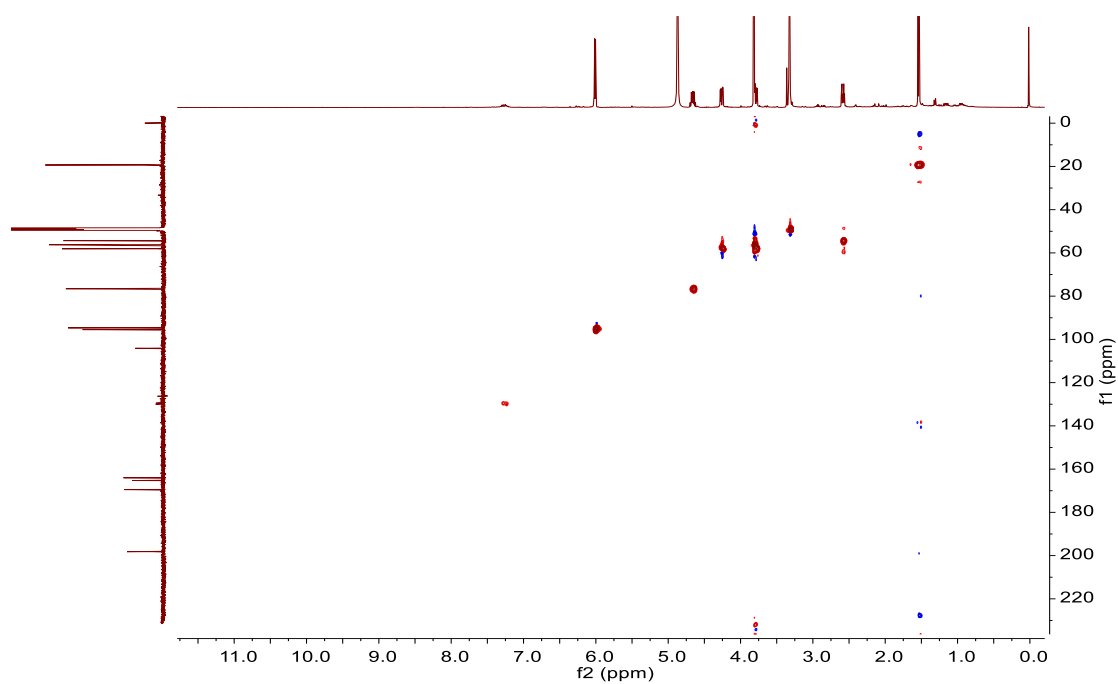

Figure S17 HSQC spectrum of compound **2** (in CD<sub>3</sub>OD)

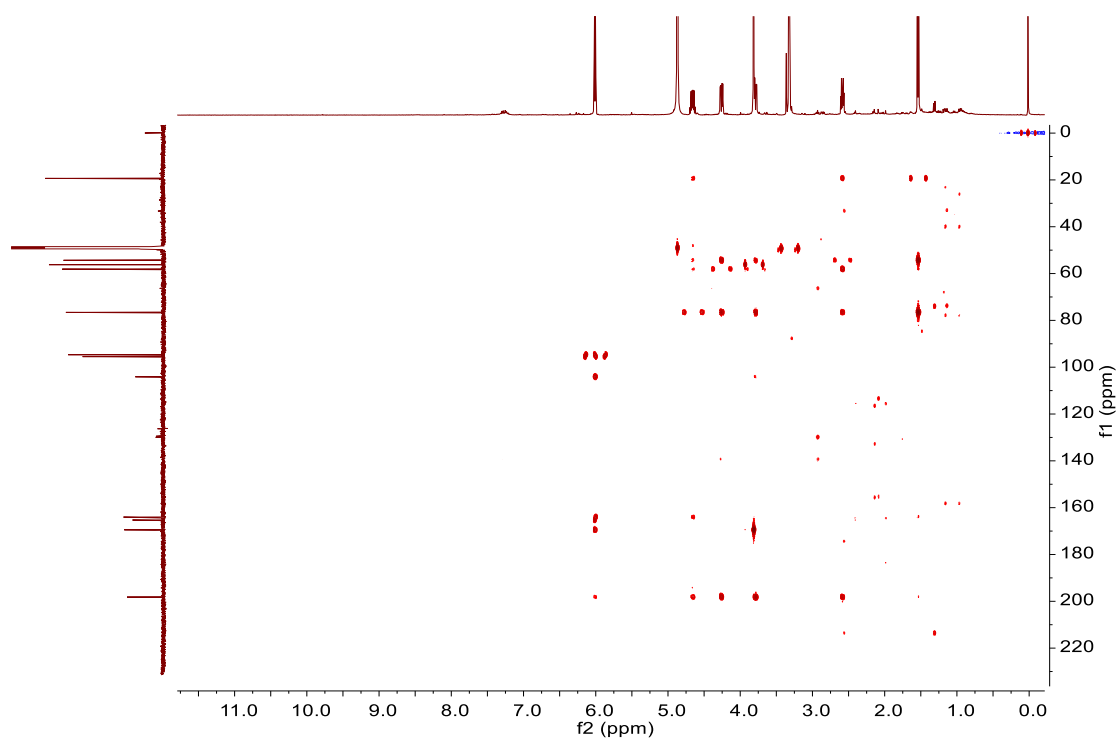

Figure S18 HMBC spectrum of compound **2** (in CD<sub>3</sub>OD)



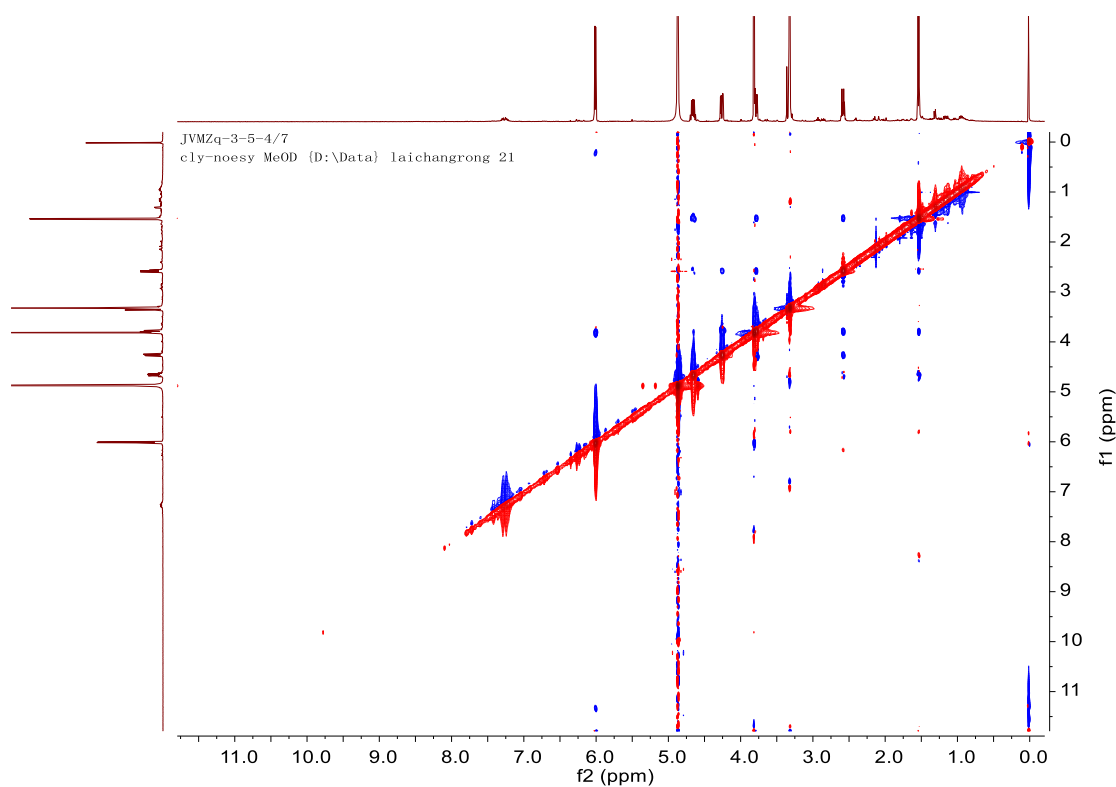

Figure S19 NOESY spectrum of compound **2** (in CD<sub>3</sub>OD)

#### Single Mass Analysis

Tolerance = 5.0 mDa / DBE: min = -1.5, max = 50.0

Element prediction: Off

Number of isotope peaks used for i-FIT = 3

Monoisotopic Mass, Even Electron Ions

30 formula(e) evaluated with 1 results within limits (up to 50 best isotopic matches for each mass)

Elements Used:

C: 0-30 H: 0-50 O: 0-10

JVM29-9-9-1

20220613033 131 (1.070)

1: TOF MS ES+  
9.00e+004

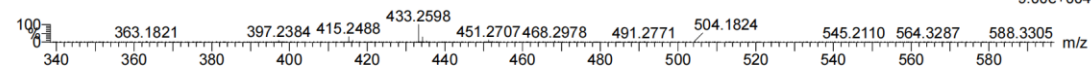

Minimum: -1.5  
Maximum: 50.0

| Mass     | Calc. Mass | mDa | PPM | DBE | i-FIT | Norm | Conf(%) | Formula    |
|----------|------------|-----|-----|-----|-------|------|---------|------------|
| 451.2707 | 451.2696   | 1.1 | 2.4 | 6.5 | 130.0 | n/a  | n/a     | C25 H39 O7 |

Figure S20 HR-ESI-MS spectrum of compound **6**

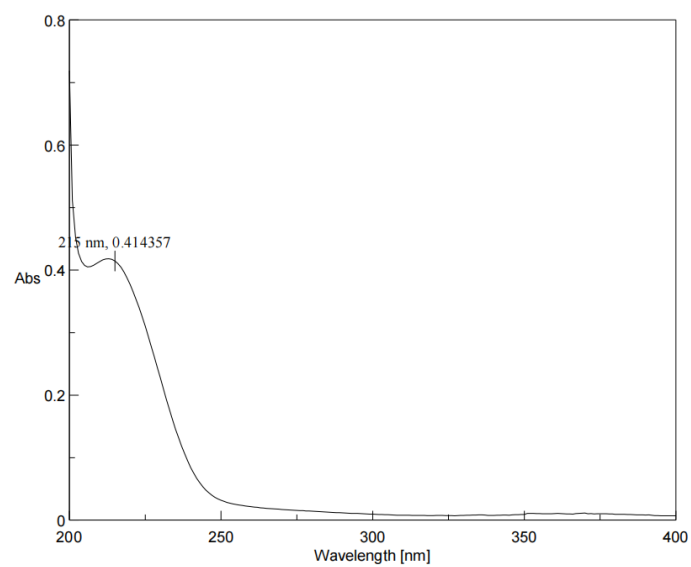

Figure S21 UV spectrum of compound **6**

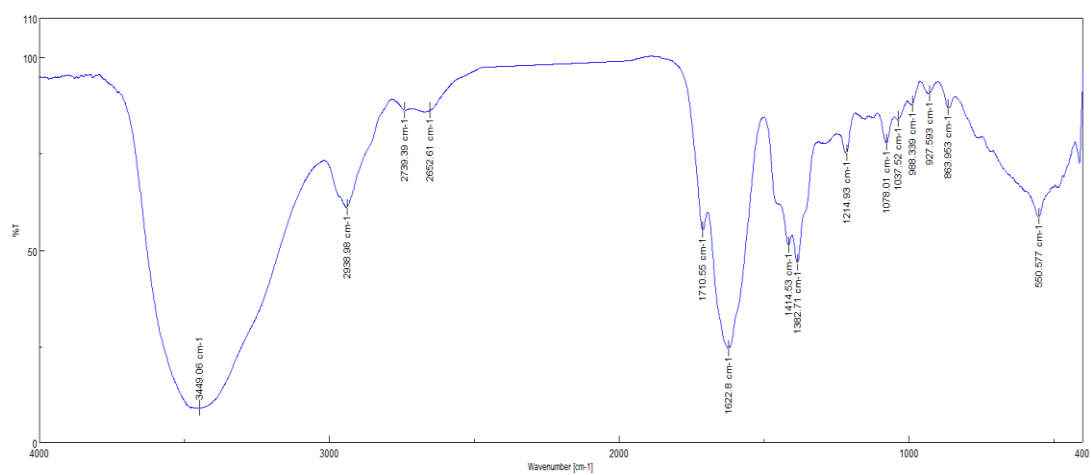

Figure S22 IR spectrum of compound **6**

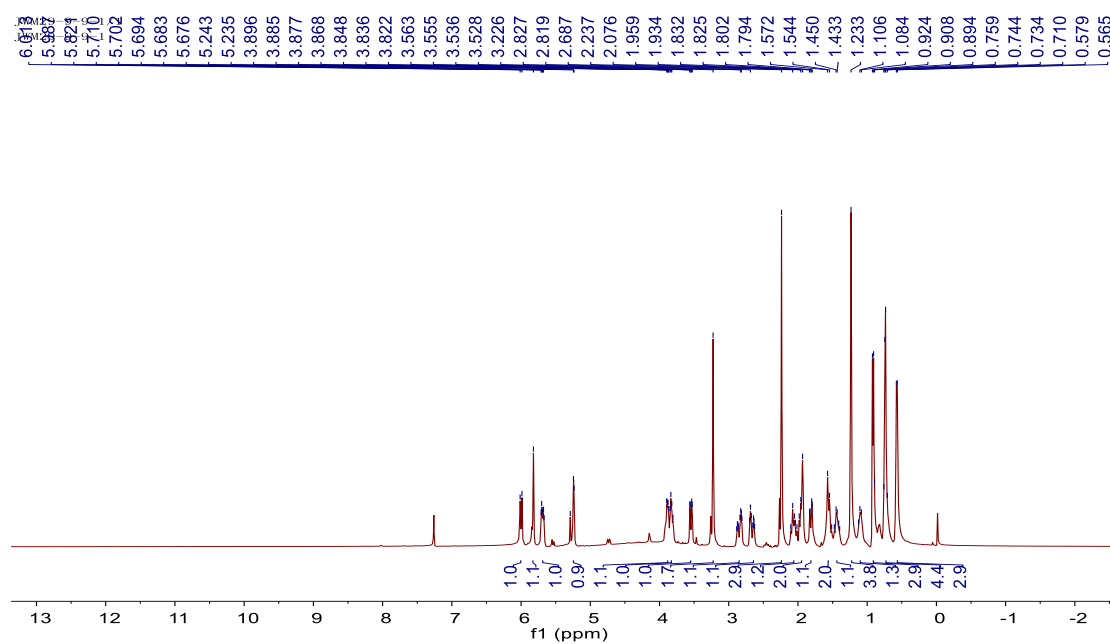

Figure S23 <sup>1</sup>H-NMR spectrum of compound **6** (in CDCl<sub>3</sub>)

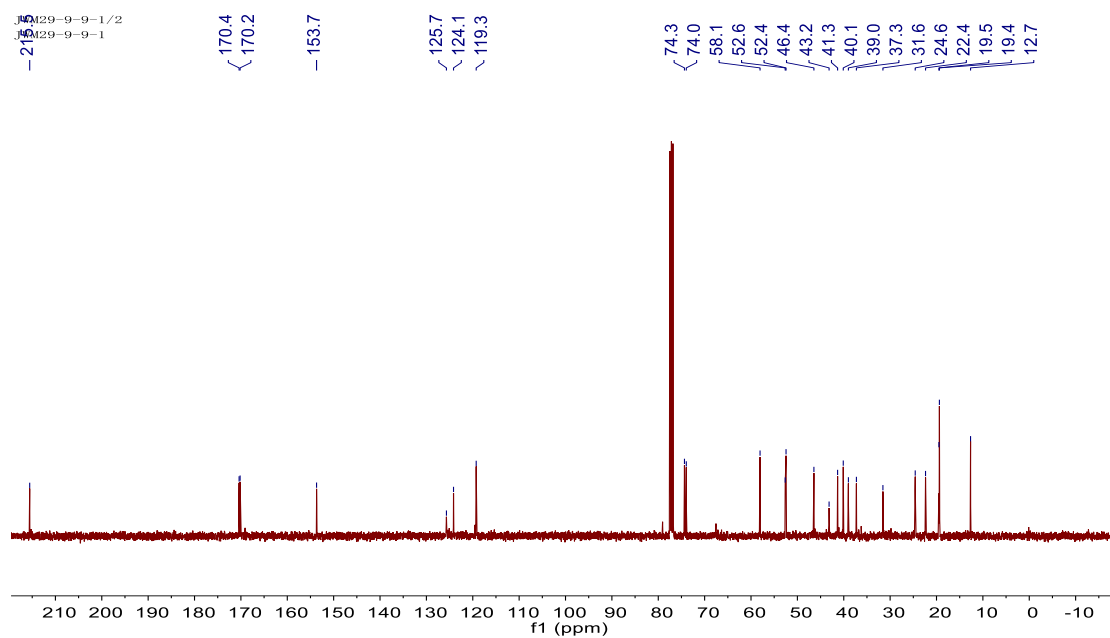

Figure S24 <sup>13</sup>C-NMR spectrum of compound **6** (in CDCl<sub>3</sub>)

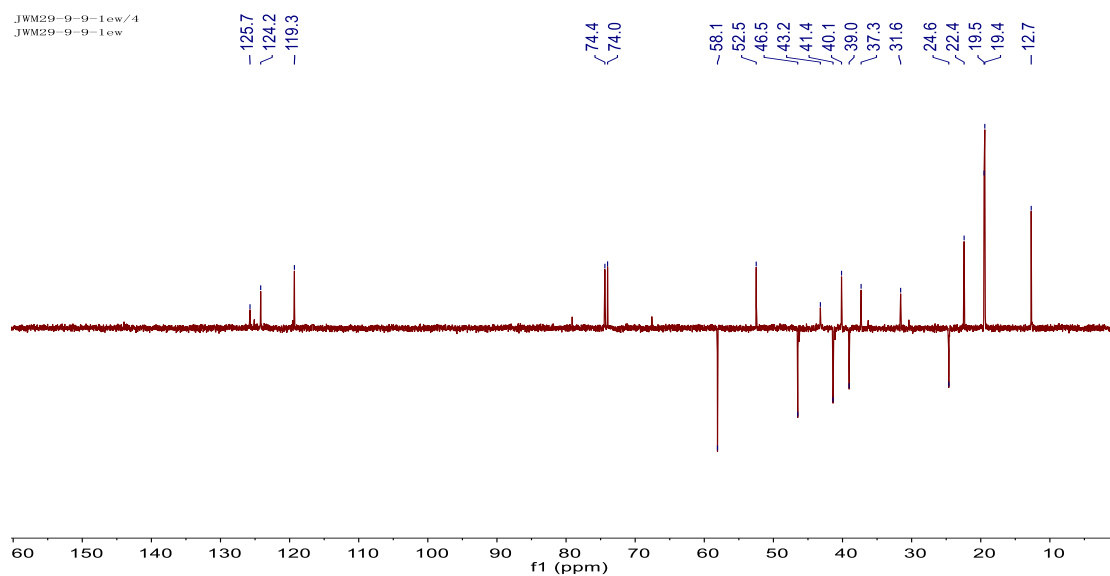

Figure S25 DEPT135 spectrum of compound **6** (in CDCl<sub>3</sub>)

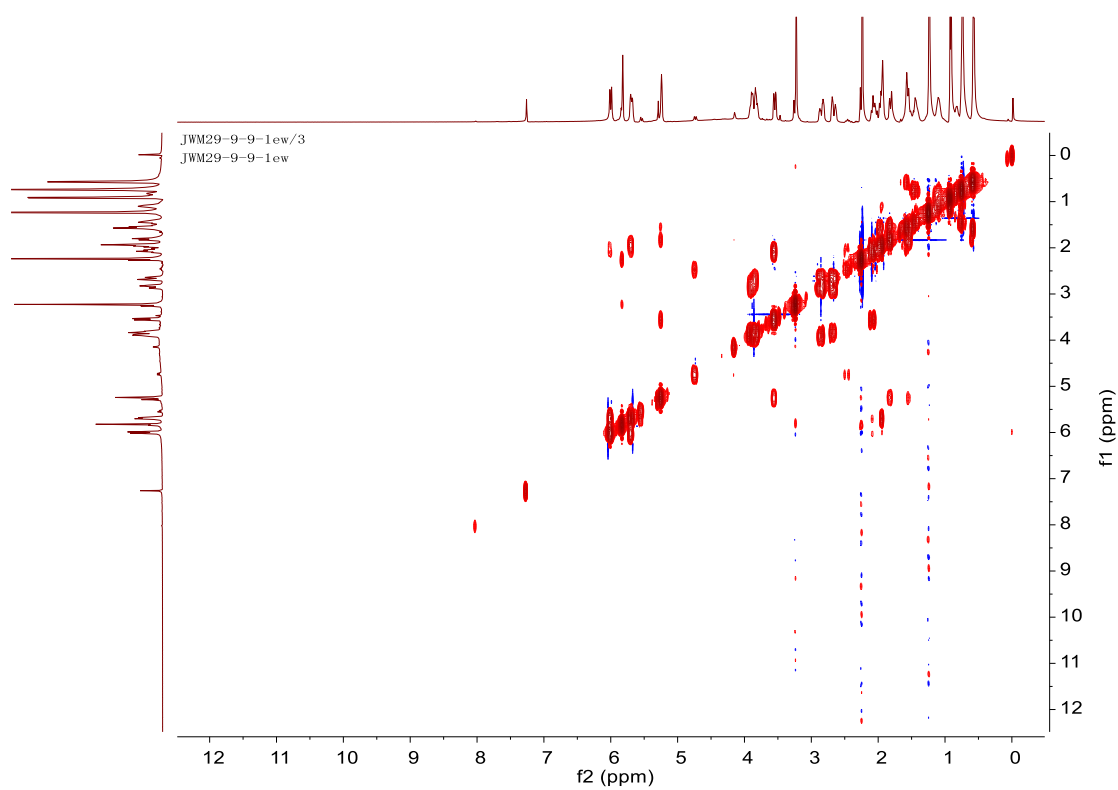

Figure S26 <sup>1</sup>H-<sup>1</sup>H COSY spectrum of compound **6** (in CDCl<sub>3</sub>)

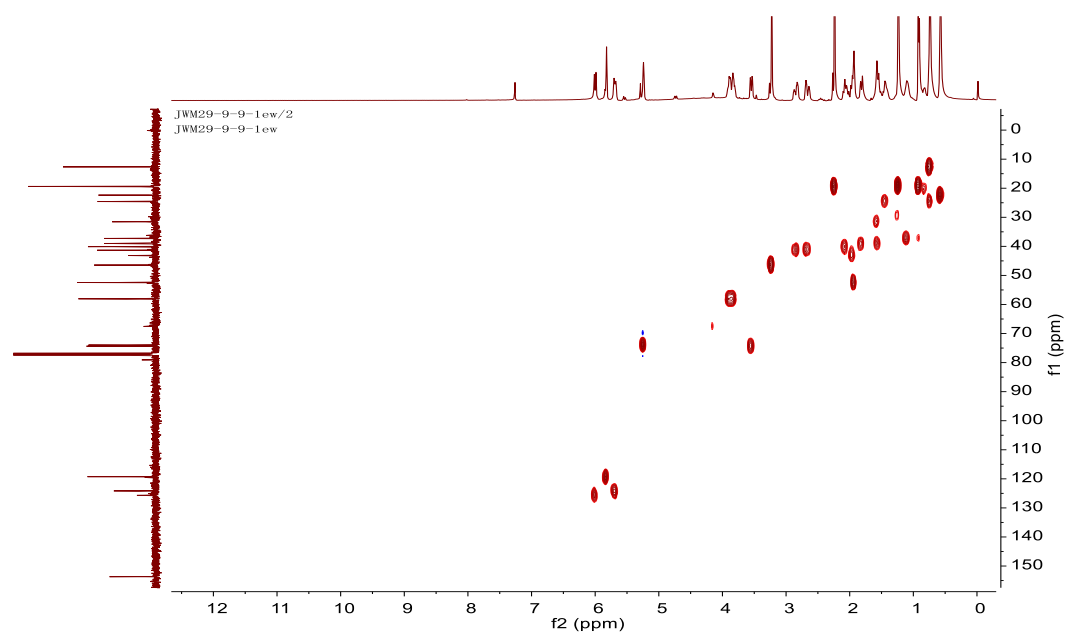

Figure S27 HSQC spectrum of compound **6** (in  $\text{CDCl}_3$ )

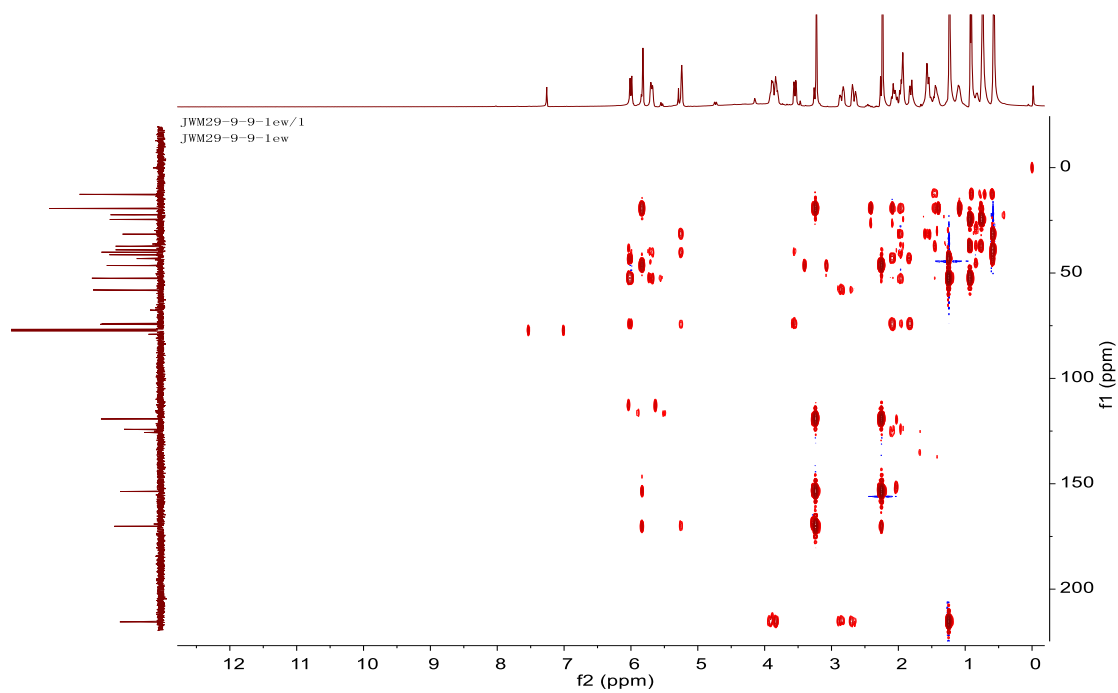

Figure S28 HMBC spectrum of compound **6** (in  $\text{CDCl}_3$ )

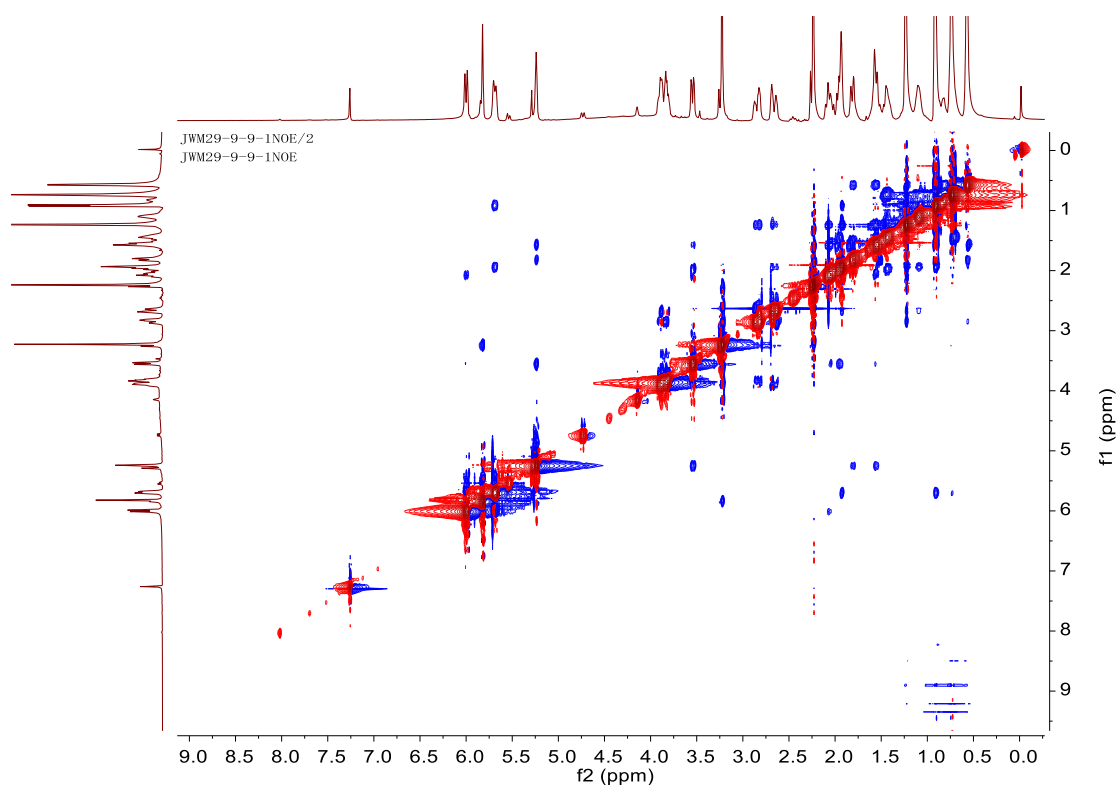

Figure S29 NOESY spectrum of compound **6** (in  $\text{CDCl}_3$ )

#### Single Mass Analysis

Tolerance = 5.0 mDa / DBE: min = -1.5, max = 50.0

Element prediction: Off

Number of isotope peaks used for i-FIT = 3

Monoisotopic Mass, Even Electron Ions

30 formula(e) evaluated with 1 results within limits (up to 50 best isotopic matches for each mass)

Elements Used:

C: 0-30 H: 0-50 O: 0-10

JWM29-9-9-2

20220613034 132 (1.077)

1: TOF MS ES+  
3.73e+005

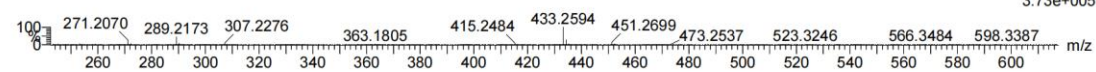

Minimum: -1.5  
Maximum: 50.0

| Mass     | Calc. Mass | mDa | PPM | DBE | i-FIT | Norm | Conf(%) | Formula    |
|----------|------------|-----|-----|-----|-------|------|---------|------------|
| 451.2699 | 451.2696   | 0.3 | 0.7 | 6.5 | 229.4 | n/a  | n/a     | C25 H39 O7 |

Figure S30 HR-ESI-MS spectrum of compound **7**

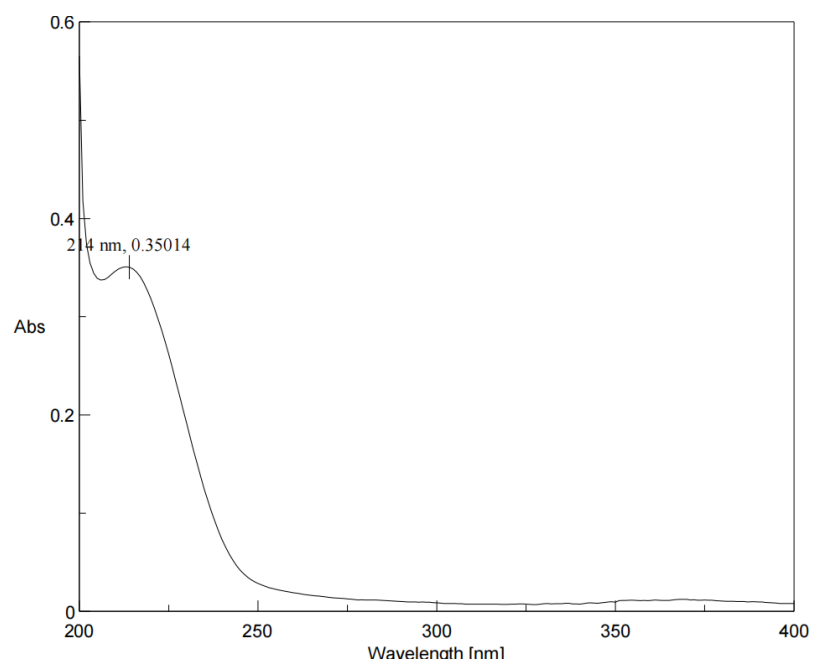

Figure S31 UV spectrum of compound **7**

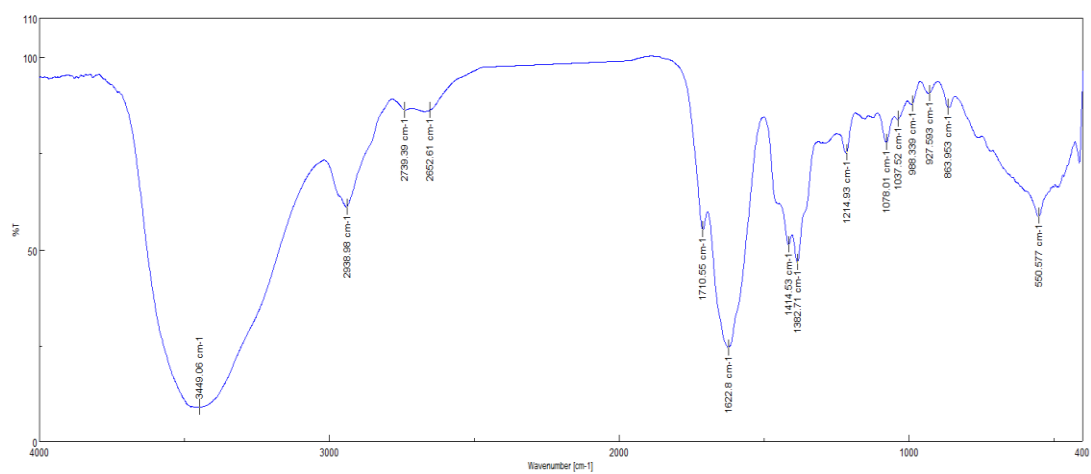

Figure S32 IR spectrum of compound **7**

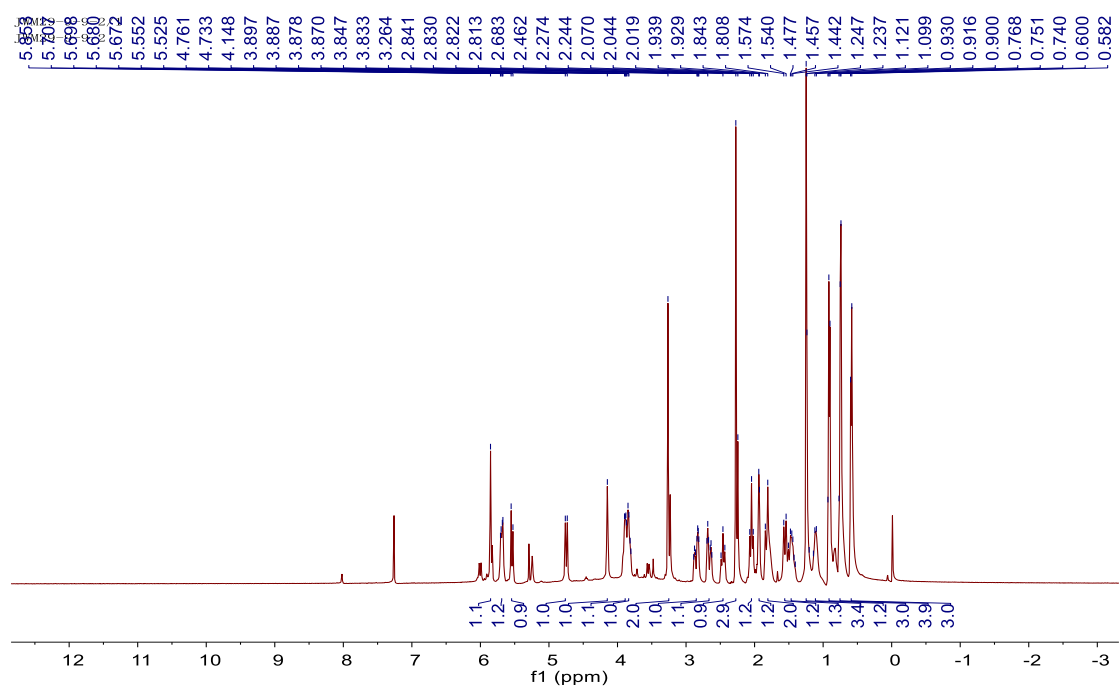

Figure S33  $^1\text{H}$ -NMR spectrum of compound **7** (in  $\text{CDCl}_3$ )

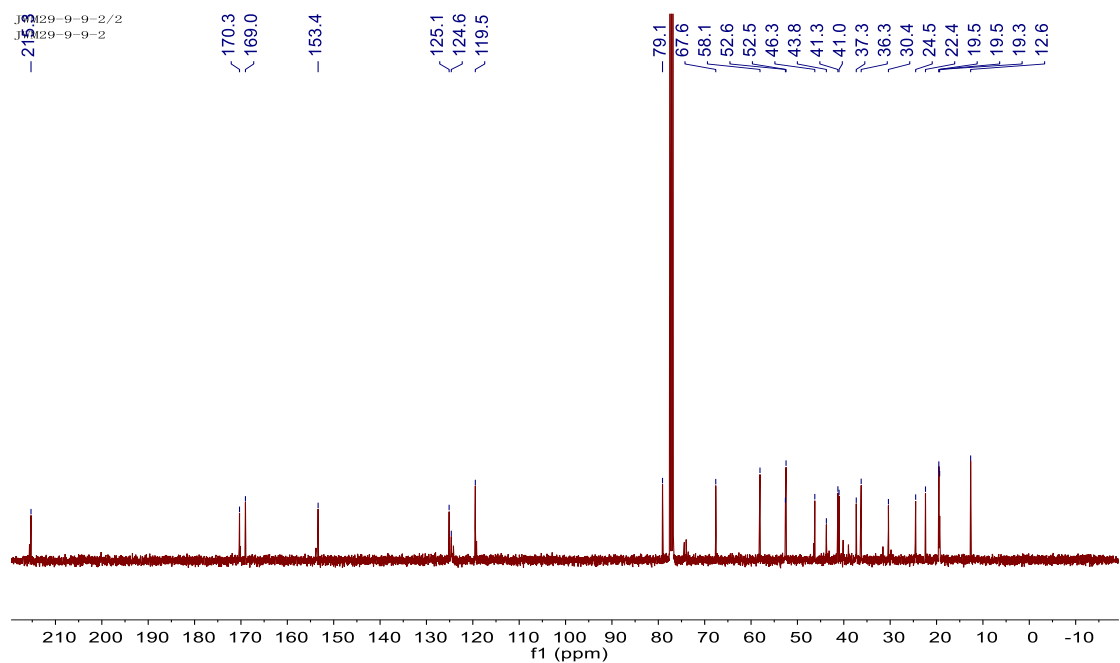

Figure S34  $^{13}\text{C}$ -NMR spectrum of compound **7** (in  $\text{CDCl}_3$ )



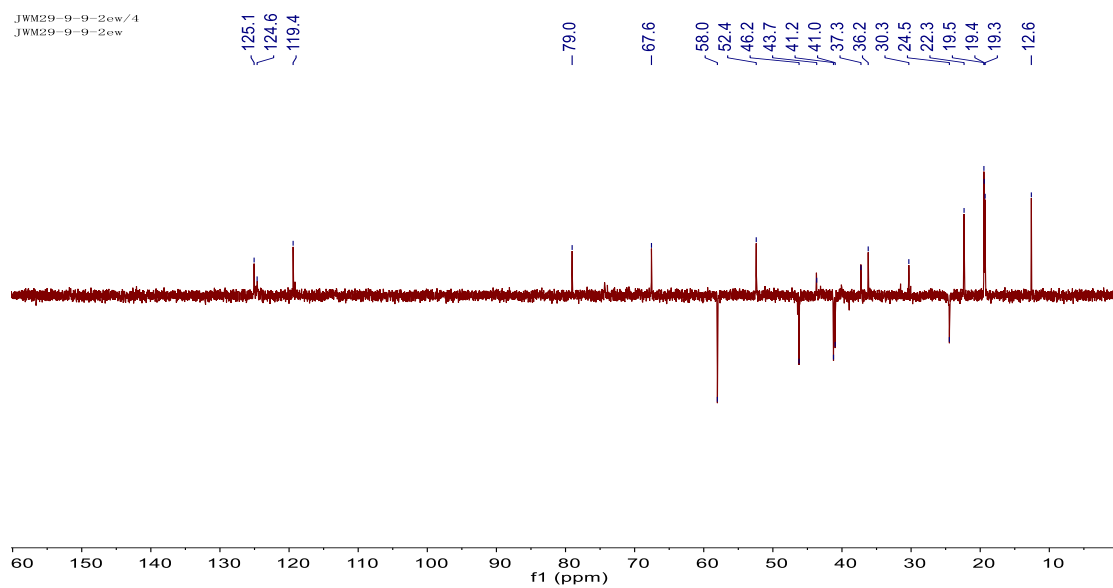

Figure S35 DEPT135 spectrum of compound **7** (in CDCl<sub>3</sub>)

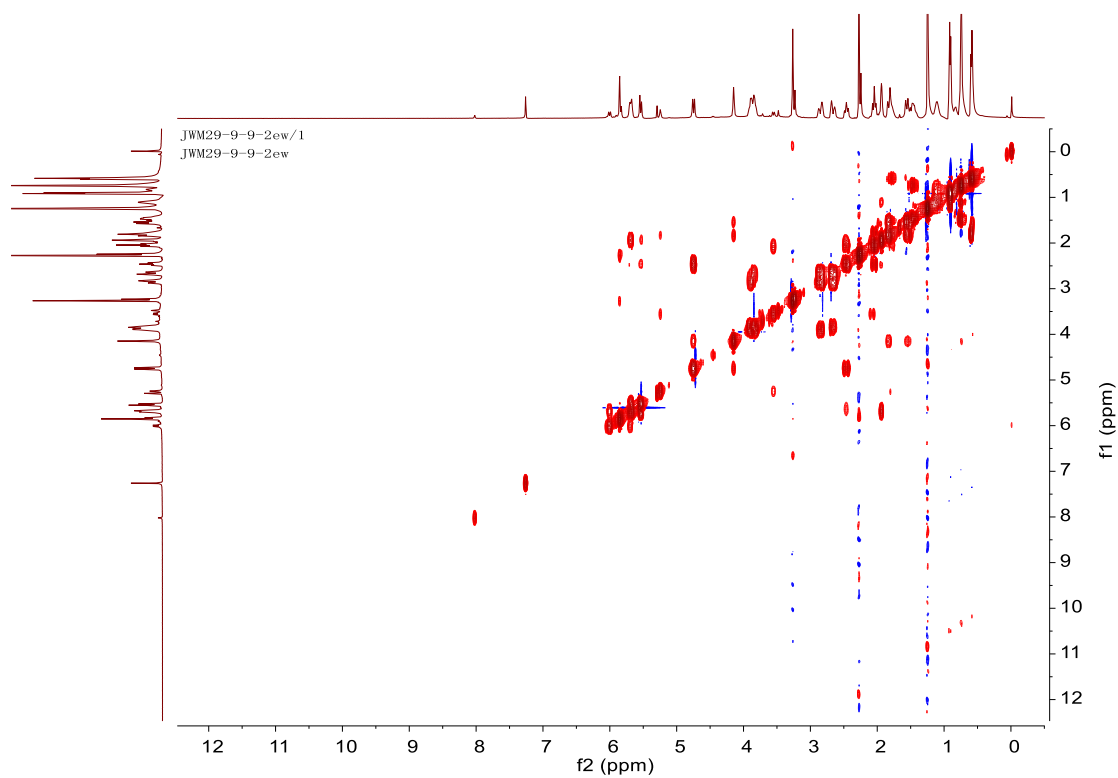

Figure S36 <sup>1</sup>H-<sup>1</sup>H COSY spectrum of compound **7** (in CDCl<sub>3</sub>)

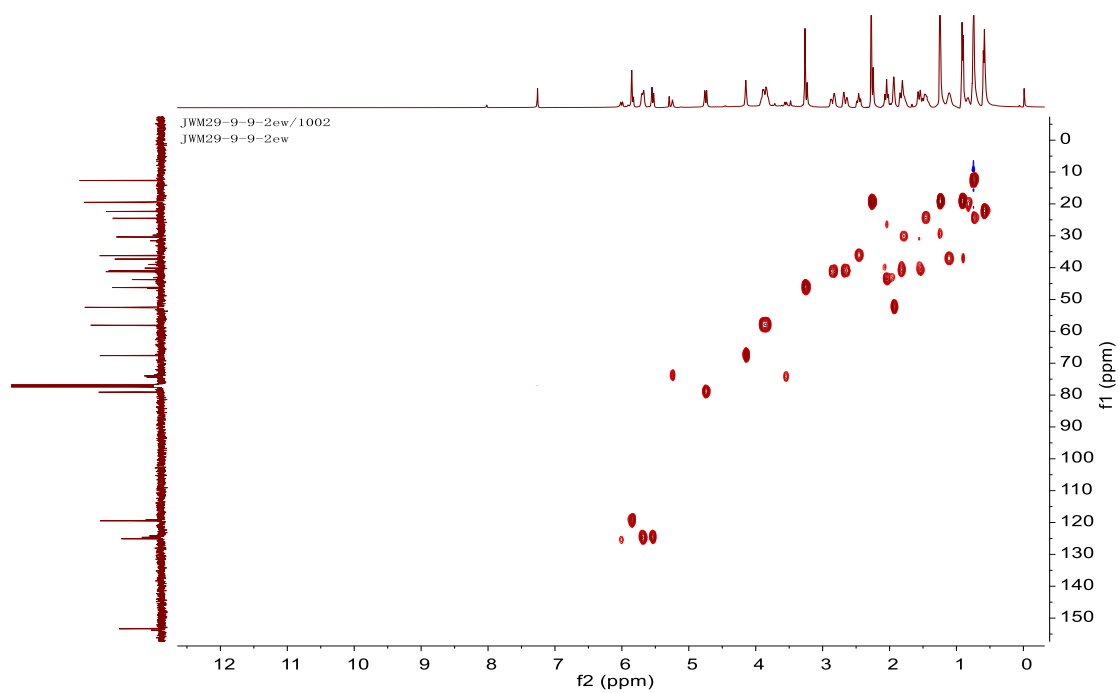

Figure S37 HSQC spectrum of compound **7** (in CDCl<sub>3</sub>)

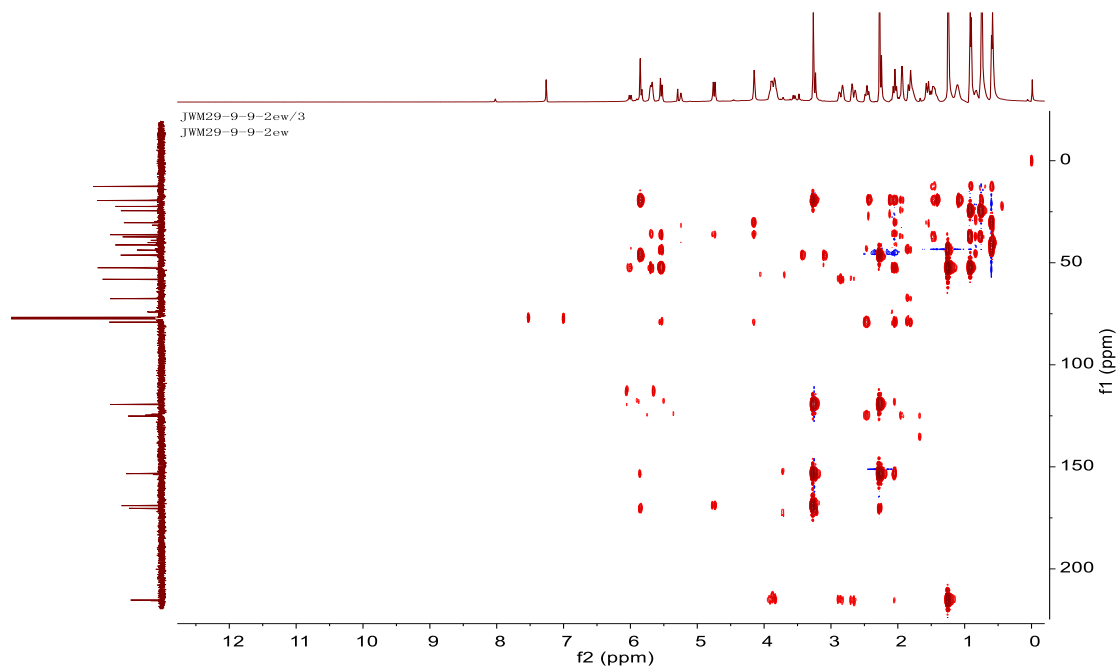

Figure S38 HMBC spectrum of compound **7** (in CDCl<sub>3</sub>)

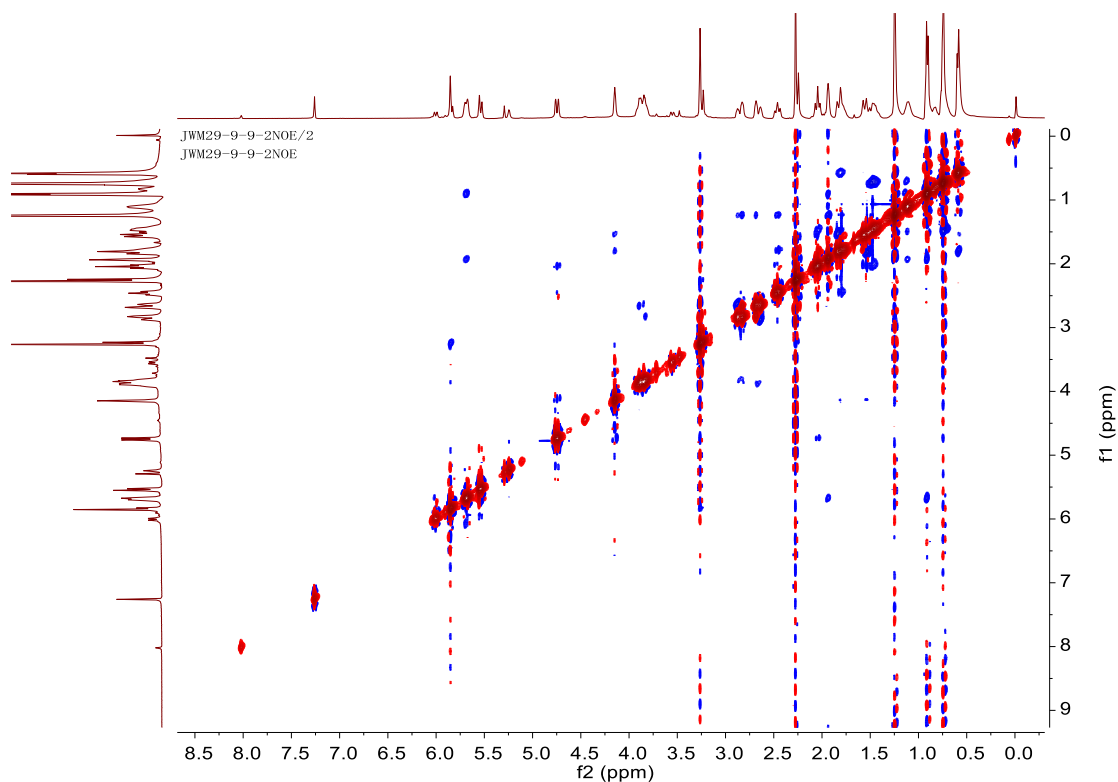

Figure S39 NOESY spectrum of compound **7** (in CDCl<sub>3</sub>)

#### Single Mass Analysis

Tolerance = 5.0 mDa / DBE: min = -1.5, max = 50.0

Element prediction: Off

Number of isotope peaks used for i-FIT = 3

Monoisotopic Mass, Even Electron Ions

30 formula(e) evaluated with 1 results within limits (up to 50 closest results for each mass)

Elements Used:

C: 0-30 H: 0-50 O: 0-10

JWM29-9-9-4

20220613037 142 (1.152)

1: TOF MS ES+  
2.31e+005

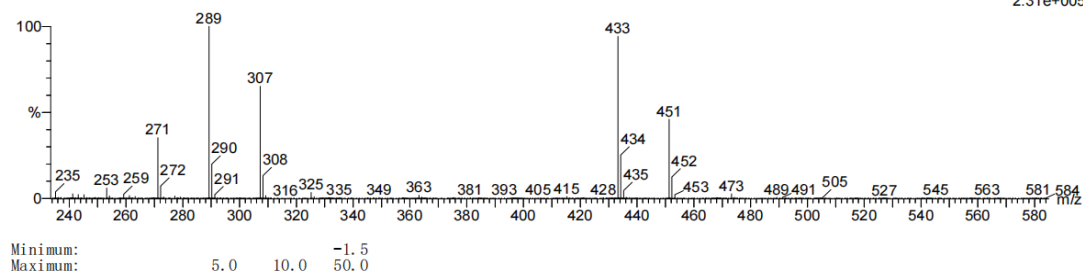

Minimum: -1.5  
Maximum: 50.0

| Mass     | Calc. Mass | mDa | PPM | DBE | i-FIT | Norm | Conf (%) | Formula                                        |
|----------|------------|-----|-----|-----|-------|------|----------|------------------------------------------------|
| 451.2697 | 451.2696   | 0.1 | 0.2 | 6.5 | 275.9 | n/a  | n/a      | C <sub>25</sub> H <sub>39</sub> O <sub>7</sub> |

Figure S40 HR-ESI-MS spectrum of compound **8**

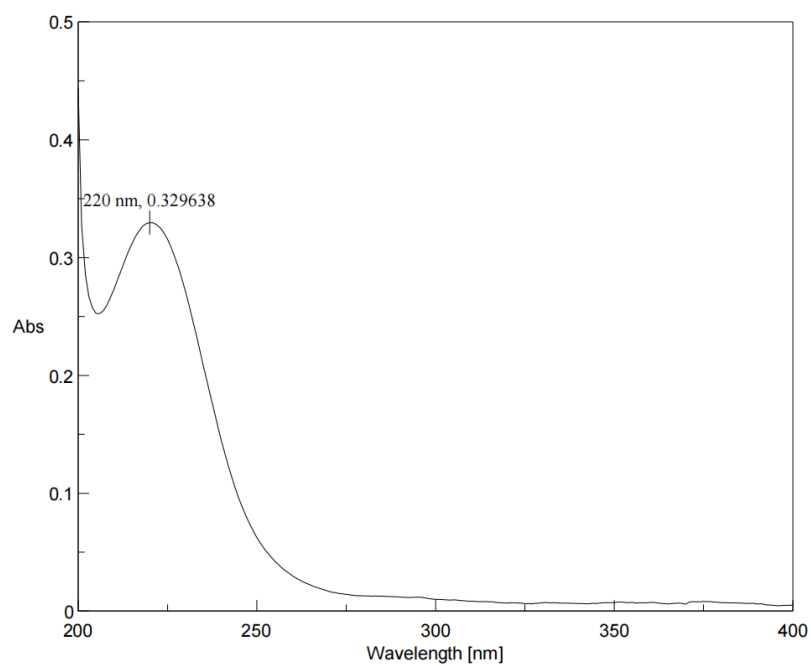

Figure S41 UV spectrum of compound **8**

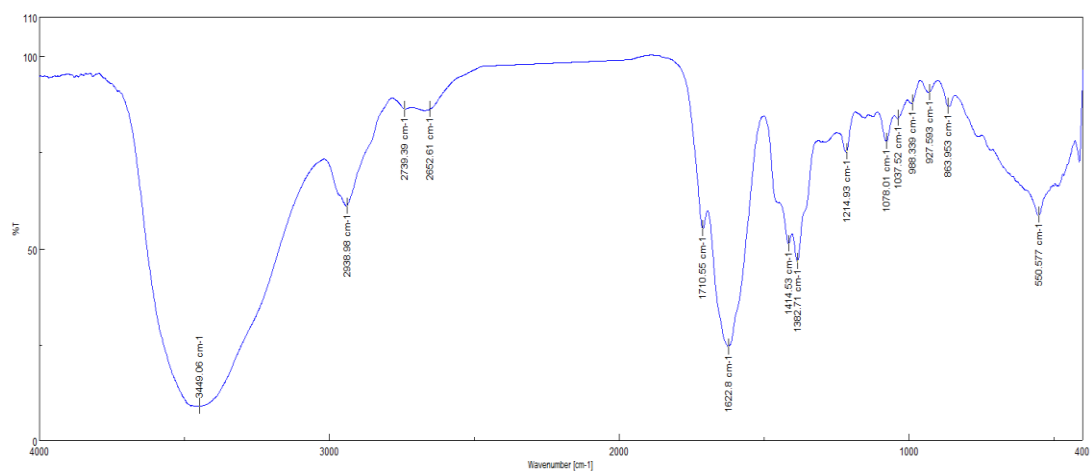

Figure S42 IR spectrum of compound **8**



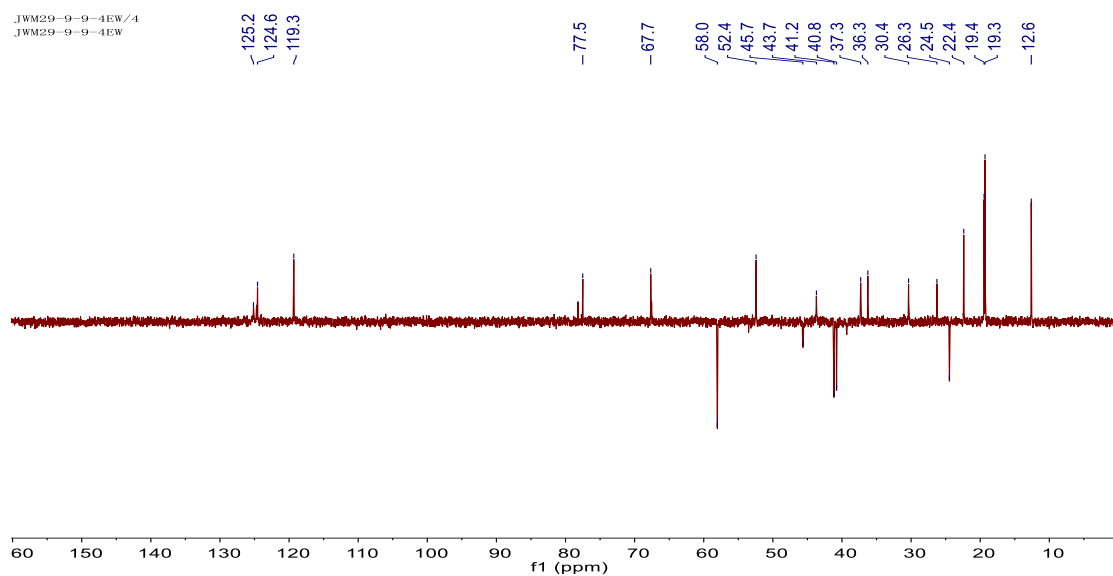

Figure S45 DEPT135 spectrum of compound **8** (in CDCl<sub>3</sub>)

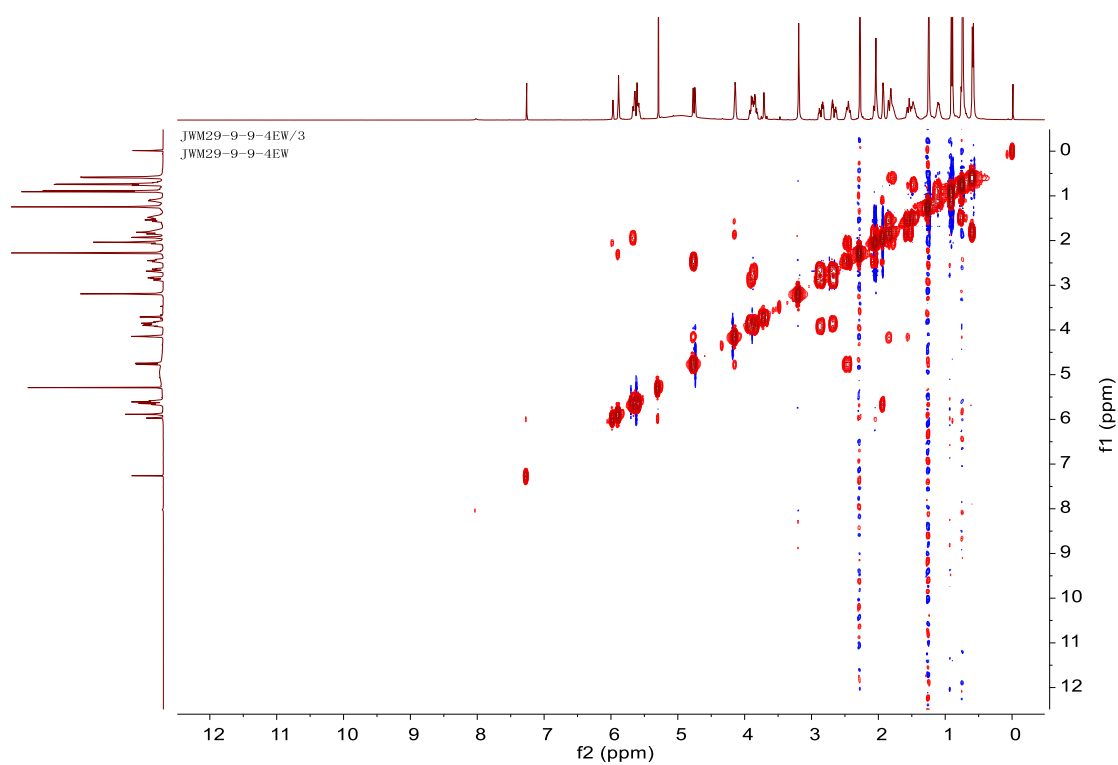

Figure S46 <sup>1</sup>H-<sup>1</sup>H COSY spectrum of compound **8** (in CDCl<sub>3</sub>)

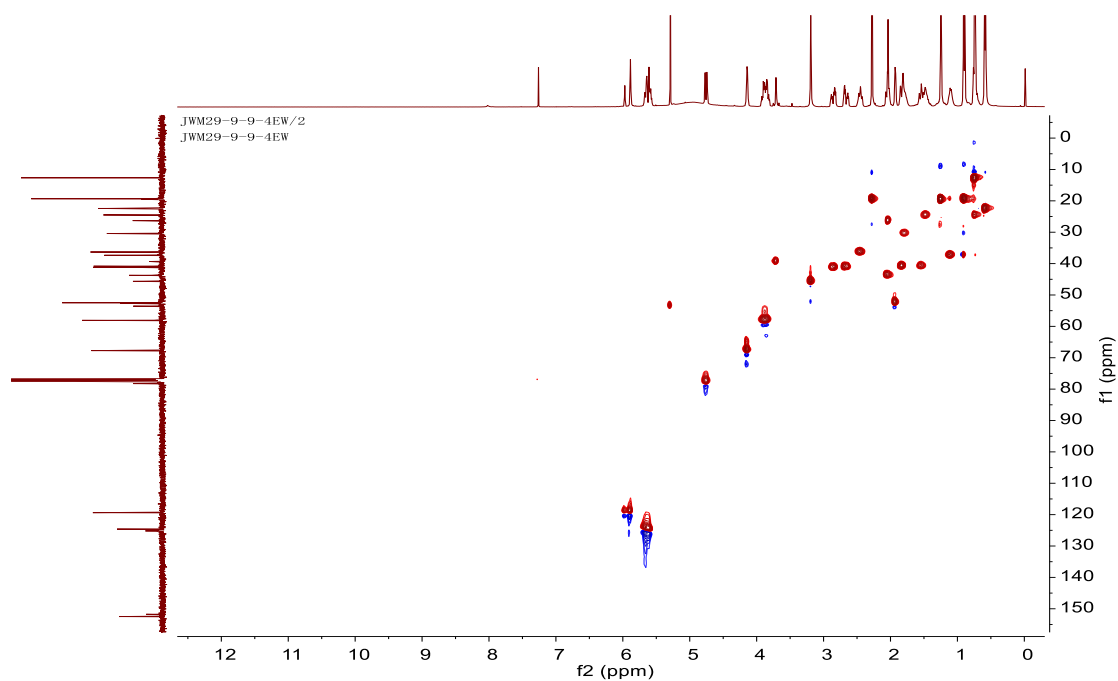

Figure S47 HSQC spectrum of compound **8** (in CDCl<sub>3</sub>)

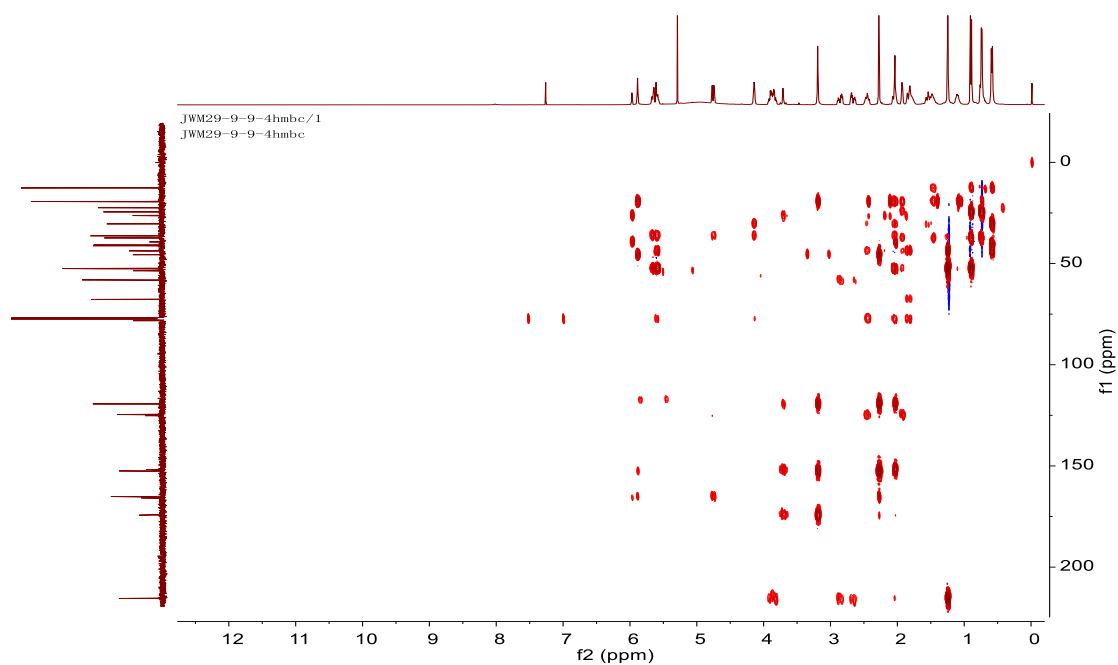

Figure S48 HMBC spectrum of compound **8** (in CDCl<sub>3</sub>)

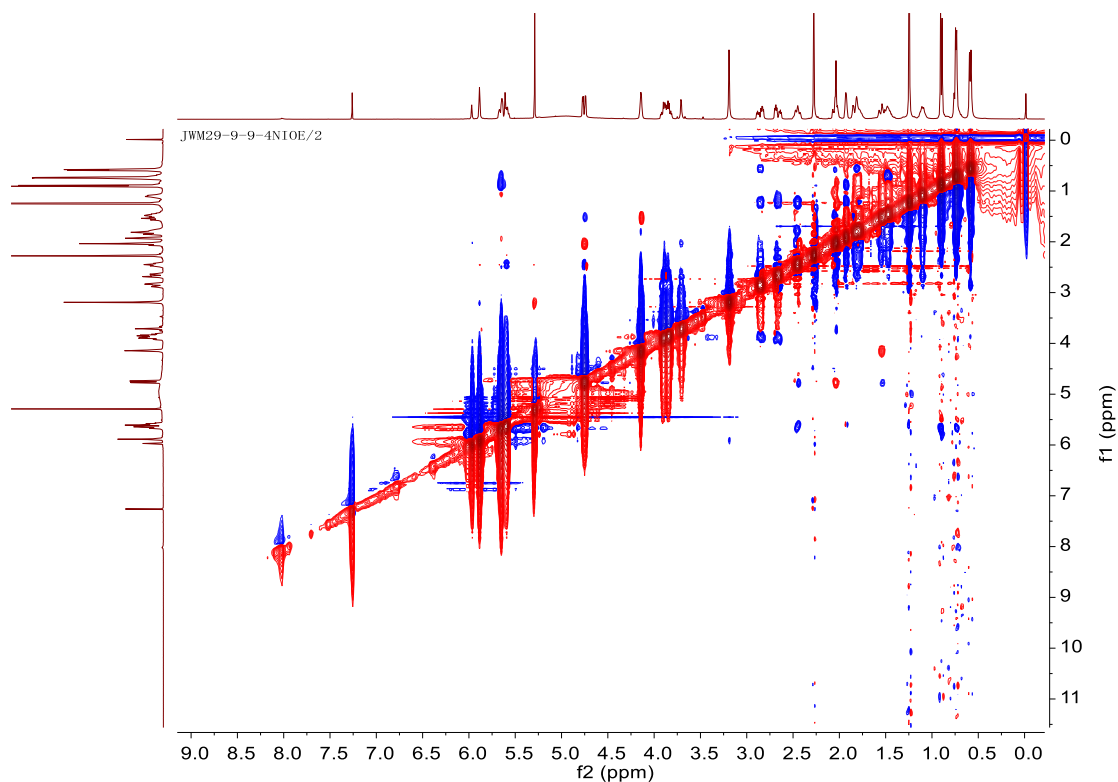

Figure S49 NOESY spectrum of compound **8** (in CDCl<sub>3</sub>)

#### Single Mass Analysis

Tolerance = 5.0 mDa / DBE: min = -1.5, max = 50.0

Element prediction: Off

Number of isotope peaks used for i-FIT = 3

Monoisotopic Mass, Even Electron Ions

42 formula(e) evaluated with 1 results within limits (up to 50 best isotopic matches for each mass)

Elements Used:

C: 0-30 H: 0-50 O: 0-10

JWM29-9-9-2

20220613034 142 (1.152)

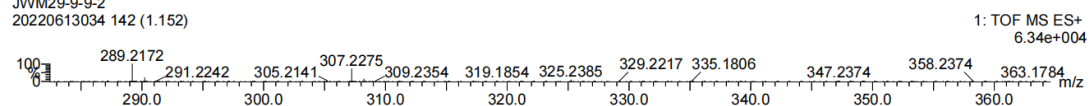

Minimum:

Maximum: 5.0 10.0 -1.5 50.0

| Mass     | Calc. Mass | mDa | PPM | DBE | i-FIT | Norm | Conf (%) | Formula    |
|----------|------------|-----|-----|-----|-------|------|----------|------------|
| 325.2385 | 325.2379   | 0.6 | 1.8 | 3.5 | 102.5 | n/a  | n/a      | C19 H33 O4 |

Figure S50 HR-ESI-MS spectrum of compound **6A**



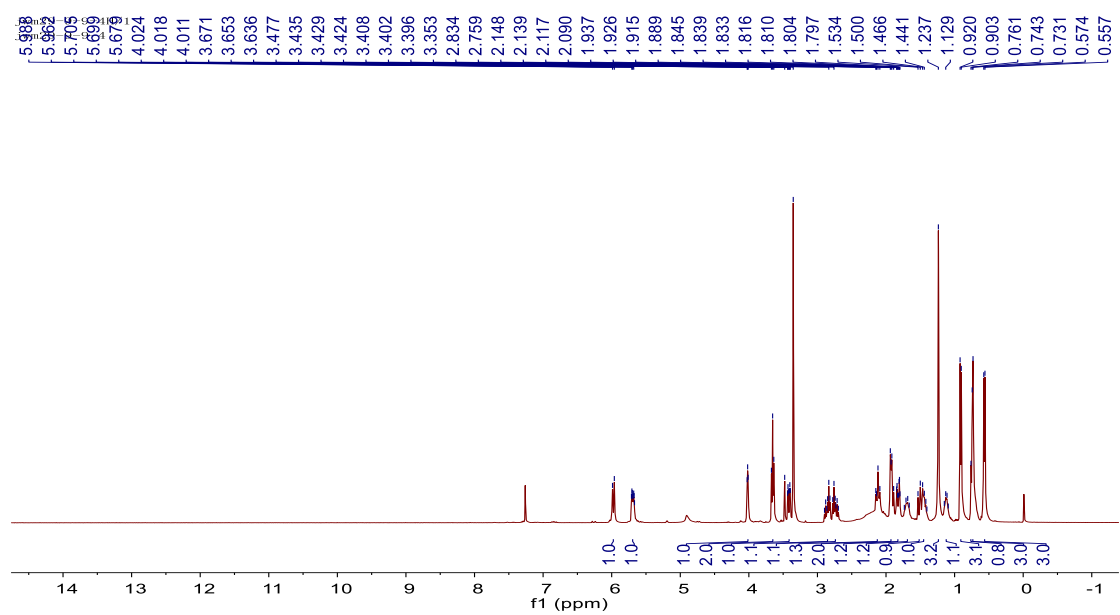

Figure S51 <sup>1</sup>H-NMR spectrum of compound **6A** (in CDCl<sub>3</sub>)

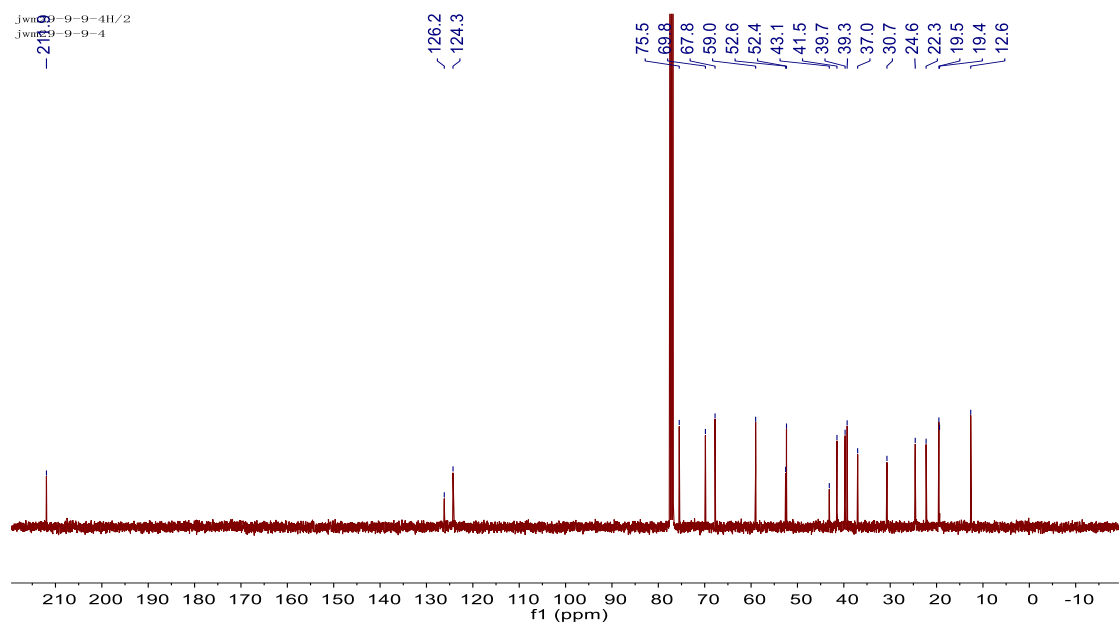

Figure S52 <sup>13</sup>C-NMR spectrum of compound **6A** (in CDCl<sub>3</sub>)
